# Grow with the flow: a latitudinal cline in physiology is associated with more variable precipitation in *Erythranthe cardinalis*

## Abstract

Local adaptation is commonly observed in nature: organisms perform well in their natal environment, but poorly outside it. Correlations between traits and latitude, or latitudinal clines, are among the most common pieces of evidence for local adaptation, but identifying the traits under selection and the selective agents is challenging. Here, we investigated a latitudinal cline in growth and photosynthesis across 16 populations of the perennial herb *Erythranthe cardinalis* (Phrymaceae). Using machine learning methods, we identify interannual variation in precipitation as a likely selective agent: Southern populations from more variable environments had higher photosynthetic rates and grew faster. We hypothesize that selection may favor a more annualized life history – grow now rather than save for next year – in environments where severe droughts occur more often. Thus our study provides insight into how species may adapt if Mediterranean climates become more variable due to climate change.

## Introduction

1 Local adaptation has been documented within numerous species; populations generally  
2 have higher fitness in their native environment, but perform poorly outside it (Schluter,  
3 2000; Leimu and Fischer, 2008; Hereford, 2009). However, the prevalence of local adapta-  
4 tion remains difficult to assess because researchers rarely test for local adaptation unless  
5 there are obvious phenotypic or environmental differences (but see Hereford and Winn  
6 2008). When local adaptation occurs, it frequently leads to clines in both phenotypes and

7 allele frequencies when selection varies over environmental gradients (Huxley, 1938; Endler,  
8 1977; Barton, 1999). Phenotypic differences between populations along a cline often have  
9 a genetic basis and can be studied in a common garden (Turesson, 1922; Clausen et al.,  
10 1940; Hiesey et al., 1942). Despite a long history of studying local adaptation and clines,  
11 it remains challenging to identify exactly which traits are under selection and which differ  
12 for nonadaptive reasons. In particular, the role that physiological differences play in local  
13 adaptation is poorly understood, despite the fact that physiology is frequently assumed to  
14 explain adaptation to the abiotic environment. A related problem is identifying which of  
15 the myriad and often covarying aspects of the environment causes spatially varying selective  
16 pressures.

17 When populations are locally adapted, reaction norms for fitness will cross, such that local  
18 genotypes have higher fitness than foreign genotypes and rank orders change across envi-  
19 ronments (Kawecki and Ebert, 2004). The traits that underlie local adaptation, however,  
20 need not mirror this pattern. Populations can have fixed genetic differences conferring  
21 trait values that are adaptive at home but neutral or maladaptive away. Alternatively,  
22 the ability to plastically respond to a particular environment or the magnitude of response  
23 to an environment could be adaptive. We distinguish between these patterns of adaptive  
24 trait differences by referring to ‘intrinsic’ and ‘plastic’ trait variation, respectively. Both  
25 intrinsic and plastic trait variation can be explained by genetic differences and both are  
26 involved in adaptation. For example, intrinsic differences in photoperiod responses (Black-  
27 man et al., 2011) and developmental rate (Stinchcombe et al., 2004) allow organisms to  
28 properly time their life history with the local environment. Conversely, sun and shade  
29 plants do not have intrinsically higher or lower rates of carbon assimilation, but rather,  
30 genotype-by-environment interactions cause sun plants to assimilate more under high light  
31 and shade plants under low light (Givnish, 1988). In plants especially, we know little about  
32 the prevalence and adaptive significance of variation in fundamental physiological traits like  
33 photosynthesis and their impact on plant performance.

34 A basic approach to identify candidate traits underlying local adaptation is to find asso-  
35 ciations between traits and environments. Either intrinsic and/or plastic variation should  
36 vary clinally along environmental gradients. Indeed, clines in ecologically important traits  
37 are widespread in nature (Endler, 1977) and often adaptive, but in most cases the selective  
38 agent is unknown. For example, in *Drosophila* numerous latitudinal clines exist for traits  
39 like thermal tolerance (Hoffmann et al., 2002), body size (Coyne and Beecham (1987) and  
40 references therein), and life history (Schmidt et al., 2005). Some *Drosophila* clines have  
41 evolved multiple times (Oakeshott et al. (1982); Huey et al. (2000), see also Bradshaw and  
42 Holzapfel (2001)) or shifted in response to climate change (Umina et al., 2005), evincing  
43 climatic adaptation. Similarly, plant species exhibit latitudinal clines in traits like flowering  
44 time (Stinchcombe et al., 2004), cyanogenesis (Kooyers and Olsen, 2012), leaf morphology  
45 (Hopkins et al., 2008; Stock et al., 2014), and drought response (Kooyers et al., 2015) that  
46 likely relate to climatic variation.

47 Despite the fact that latitudinal clines have been studied for a long time, latitude *per se*  
48 cannot be a selective agent. Latitude may be strongly correlated with one or two key  
49 climatic variables, such as temperature, precipitation, or growing degree-days. Latitude  
50 may also correlate with the strength of biotic interactions (Schemske et al., 2009) or other  
51 nonclimatic aspects of the environment, though as we explain below, we do not yet have  
52 compelling data that these are important in our study system. Hence, we focus on whether  
53 latitude could be an effective proxy for an underlying climatic driver, in which case we  
54 would expect a yet stronger relationship between traits and the key climatic variable(s)  
55 driving selection. Alternatively, latitude may be more strongly related to traits than any  
56 single climatic variable for at least two reasons. First, latitude may be correlated with  
57 several climatic agents of selection that are individually weak, but add up to a strong  
58 latitudinal cline. Alternatively, gene flow among neighbouring populations could smooth  
59 out local climatic effects, since alleles will experience selection across populations linked  
60 by migration (Slatkin, 1978; Paul et al., 2011; Hadfield, 2016). We refer to this as the

61 ‘climatic neighborhood’. For example, in mountainous regions average temperature at  
62 a given latitude varies widely, but in aggregate, a lower latitude set of populations will  
63 experience warmer climate than a higher latitude one. Thus, any particular low latitude  
64 population would be warm-adapted, even if it was located in a cooler (e.g. high elevation)  
65 site. Because many climatic factors vary latitudinally, and which climatic factors vary  
66 latitudinally changes over the earth’s surface (e.g. coastal vs. continental), dissecting the  
67 evolution of latitudinal clines across many species will help identify generalities, such as  
68 whether thermal tolerance maxima or seasonal timing is more important (Bradshaw and  
69 Holzapfel, 2008), and whether local or regional climate shapes selective pressures.

70 In this study, we investigated two major questions: 1) whether intrinsic or plastic physiolog-  
71 ical trait variation corresponds with latitude; and 2) what climatic factor(s) could plausibly  
72 be responsible for latitudinal clines. Within question 2, we tested three hypotheses outlined  
73 in the previous paragraph: latitudinal clines are explained by a single dominant climatic  
74 factor, multiple climatic factors, or the climatic neighborhood experienced by nearby popu-  
75 lation connected through gene flow. These hypotheses are not mutually exclusive since, for  
76 example, single or multiple factors in a climatic neighborhood may lead to latitudinal clines.  
77 We focused on climate because climate often determines and where species are found and  
78 also can exert strong selection on populations within species, though we acknowledge that  
79 other abiotic and biotic factors could also contribute to selection and the overall pattern  
80 of local adaptation. There is also a compelling need to know how populations are (or are  
81 not) locally adapted to climate so as to predict how they will respond to climate change  
82 (Aitken and Whitlock, 2013).

83 We examined these questions in *Erythranthe cardinalis* (formerly *Mimulus cardinalis* [Ne-  
84 som 2014]) because linking physiological traits to potentially complex patterns of local  
85 adaptation requires integrating multiple lines of evidence from comparative, experimental,  
86 and genomic studies under both lab and field conditions. Many classic and contemporary  
87 studies of local adaptation use *Mimulus sensu lato* species because of their natural his-

88 tory, easy propagation, and genetic/genomic resources (Clausen et al., 1940; Hiesey et al.,  
89 1971; Bradshaw and Schemske, 2003; Wu et al., 2008; Lowry and Willis, 2010; Wright  
90 et al., 2013). Yet, there is a deficiency of links between local adaptation and physiological  
91 mechanisms (Angert, 2006; Angert et al., 2008; Wu et al., 2010; Wright et al., 2013). We  
92 measured genetic and genotype-by-environment variation in response to temperature and  
93 drought among 16 populations distributed over 10.7° of latitude. We found a latitudinal  
94 cline of intrinsic variation in photosynthesis and growth, but little evidence for variation in  
95 plasticity. Interannual variation in precipitation and temperature are associated with this  
96 axis of variation, suggesting that climatic variance rather than mean may be an important  
97 driver of local adaptation in *E. cardinalis*. The climatic neighborhoods around populations  
98 explained trait variation better than local climate, indicating that latitudinal clines may be  
99 common because latitude integrates effects of selection on populations connected through  
100 gene flow. We place these findings in the context of life history theory and consider future  
101 directions in the Discussion.

## 102 **Material and Methods**

### 103 **Population Selection**

104 We used 16 populations from throughout the range of *E. cardinalis* (Table 1). These  
105 populations were intentionally chosen to span much of the climatic range of the species  
106 based on all known occurrences (see below). Seeds were collected in the field from mature,  
107 undehisced fruit left open for 2-4 weeks to dry, then stored at room temperature. We used  
108 seeds from 154 families, 4-12 (mean = 9.6, median = 12) families per population.

**Table 1:** Latitude, longitude, and elevation (mas = meters above seal level) of 16 focal populations used in this study.

| Name                         | Latitude | Longitude | Elevation (mas) |
|------------------------------|----------|-----------|-----------------|
| Hauser Creek                 | 32.657   | -116.532  | 799             |
| Cottonwood Creek             | 32.609   | -116.7    | 267             |
| Sweetwater River             | 32.9     | -116.585  | 1180            |
| Grade Road Palomar           | 33.314   | -116.871  | 1577            |
| Whitewater Canyon            | 33.994   | -116.665  | 705             |
| Mill Creek                   | 34.077   | -116.873  | 2050            |
| West Fork Mojave River       | 34.284   | -117.378  | 1120            |
| North Fork Middle Tule River | 36.201   | -118.651  | 1314            |
| Paradise Creek               | 36.518   | -118.759  | 926             |
| Redwood Creek                | 36.691   | -118.91   | 1727            |
| Wawona                       | 37.541   | -119.649  | 1224            |
| Rainbow Creek                | 37.819   | -120.007  | 876             |
| Middle Yuba River            | 39.397   | -121.082  | 455             |
| Little Jamison Creek         | 39.743   | -120.704  | 1603            |
| Deep Creek                   | 41.668   | -123.11   | 707             |
| Rock Creek                   | 43.374   | -122.957  | 326             |

## 109 Plant propagation

110 On 14 April, 2014, 3-5 seeds per family were sown directly on sand (Quikrete Play Sand,  
111 Georgia, USA) watered to field capacity in RLC4 Ray Leach cone-tainers placed in RL98  
112 98-well trays (Stuewe & Sons, Inc., Oregon, USA). We used pure sand because *E. cardinalis*  
113 typically grows in sandy, riparian soils (A. Angert, pers. obs.). Two jumbo-sized cotton  
114 balls at the bottom of cone-tainers prevented sand from washing out. Cone-tainers sat in  
115 medium-sized flow trays (FLOWTMD, Stuewe & Sons, Inc., Oregon, USA) to continuously  
116 bottom-water plants during germination in greenhouses at the University British Columbia  
117 campus in Vancouver, Canada (49°15' N, 123°15' W). Mistlers thoroughly wetted the top of  
118 the sand every two hours during the day. Most seeds germinated between 1 and 2 weeks,  
119 but we allowed 3 weeks before transferring seedlings to growth chambers. We recorded  
120 germination daily between one to two weeks after sowing, and every 2-3 days thereafter.

121 On 5 May (21 days after sowing), we transferred seedlings to one of two growth chambers  
122 (Model E-15 Conviron, Manitoba, Canada). We thinned seedlings to one plant per con-  
123 tainer, leaving the center-most plant. 702 of 768 (91.4%) had plants that could be used  
124 in the experiment. We allowed one week at constant, non stressful conditions (day: 20°C,  
125 night: 16°C) for plants to acclimate to growth chambers before starting treatments. The  
126 initial size of seedlings, measured as the length of the first true leaves, did not differ between  
127 populations, families, or treatments (Table S1).

## 128 **Temperature and drought treatments**

129 We imposed four treatments, a fully-factorial cross of two temperature levels and two  
130 watering levels. The temperature levels closely simulated an average growing season at the  
131 thermal extremes of the species range, which we designate as Hot and Cool treatments.  
132 Watering levels contrasted a perennial and seasonal stream, which we refer to as Well-  
133 watered and Drought treatments. A detailed description of treatments is provided in the  
134 Supplemental Materials and Methods and summarized in Fig 1. Because growth chambers  
135 cannot be subdivided, one chamber was assigned to the Hot treatment level and another  
136 to the Cool treatment level. Within each chamber, there were two Well-watered blocks  
137 and two Drought blocks. The photosynthetically active radiation in both chambers was  
138 approximately  $400 \mu\text{mol quanta m}^{-2} \text{s}^{-1}$ . The growth chambers did not control humidity,  
139 but because of watering and high plant transpiration rates, the relative humidity was quite  
140 high in both temperature levels (data not shown). Lower humidity would have made the  
141 drought more severe, but low soil moisture is stressful in and of itself. The total number of  
142 plants in each treatment was:  $n_{\text{cool,dry}} = 169$ ;  $n_{\text{cool,ww}} = 174$ ;  $n_{\text{hot,dry}} = 176$ ;  $n_{\text{hot,ww}} = 183$ .  
143 Each population had 8–12 individuals per treatment level (mean = 11, median = 11).

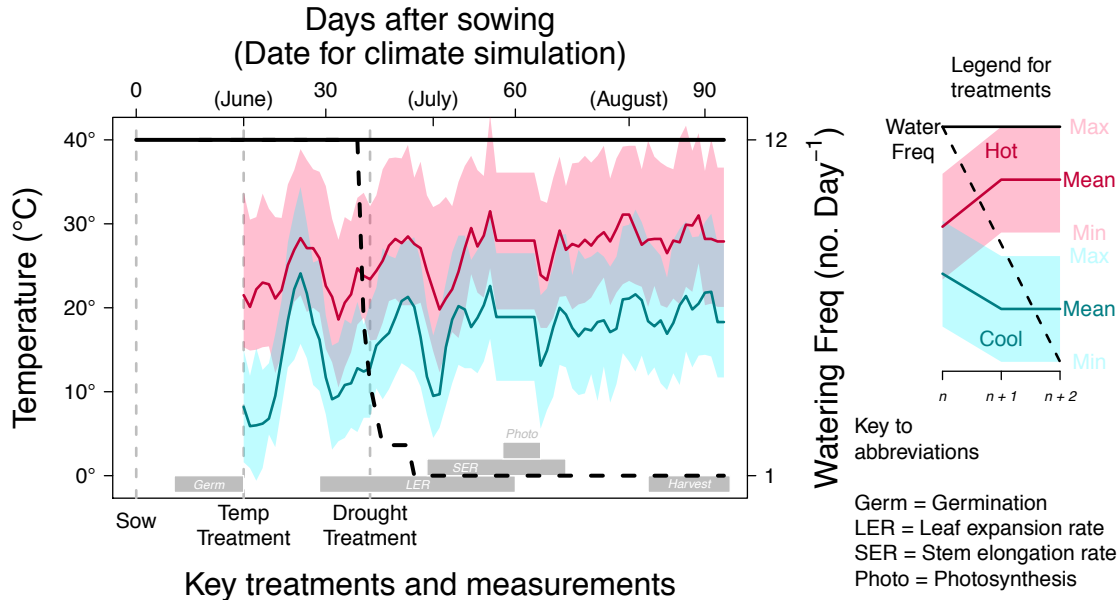

**Figure 1:** Overview of experimental treatments and timing of key trait measurements. All plants germinated within 21 days of sowing. At that time, we began temperature treatments (left axis), simulating a typical June-August weather pattern at Hot (red) and Cool (blue) sites. The bold lines track the average daily temperatures. Within each day, there was a maximum daytime temperature (top of translucent polygons) and minimum nighttime temperature (bottom of translucent polygons). The drought treatment commenced later by ramping down the frequency of bottom-watering episodes (dashed black line; right axis), while watering frequency was maintained in the control treatment (solid black line). Grey boxes on the bottom of the plot outline the period of key measurements described in the Material and Methods.

## 144 Trait measurements

145 We measured five traits in response to temperature and watering treatments (Table 2).

146 **Days to germination** We tested for population variation in germination rate, measured  
 147 as Days to Germination, using a lognormal survival model fit using the survreg function  
 148 in the R package **survival** version 2.38 (Therneau, 2015). We treated Population as a fixed  
 149 effect and Family as random effect using a  $\Gamma$  frailty function. Statistical significance of the



**Table 2:** Key traits measured in this study.

| Trait                | Units                                              |
|----------------------|----------------------------------------------------|
| Days to germination  | day                                                |
| Leaf expansion rate  | mm day <sup>-1</sup>                               |
| Stem elongation rate | cm day <sup>-1</sup>                               |
| Photosynthetic rate  | $\mu\text{mol CO}_2 \text{ m}^{-2} \text{ s}^{-1}$ |
| Mortality            | probability of death                               |

150 Population effect was determined using analysis of deviance. Note that, unlike other traits  
151 discussed below, we did not include Block, Treatment, or Population  $\times$  Treatment inter-  
152 actions because during germination plants had not been placed into blocks and treatments  
153 had not yet been applied.

154 **Growth rate: leaf expansion and stem elongation** We measured growth rate dur-  
155 ing two phases: leaf expansion and stem elongation. Growth measurements were taken  
156 during the early vegetative stage. We censused leaf length twice per week shortly after  
157 the emergence of true leaves from 12 May – 12 June (28–59 days after sowing), resulting  
158 in 10 measurements. We ceased measuring leaf length once it appeared to asymptote and  
159 growth shifted to stem elongation. We also censused plant height on 7 occasions (twice  
160 per week) between 29 May and 20 June (45 to 67 days after sowing) until plants began  
161 to initiate floral buds. Thus all growth measurements occurred during the vegetative, pre-  
162 reproductive phase. Both leaf expansion and stem elongation were modelled separately  
163 as second-order polynomials. We used empirical Bayes' estimates of growth for each indi-  
164 vidual plant from linear mixed-effects models fit with the R package **lme4** version 1.1-12  
165 (Bates et al., 2015).

166 **Photosynthesis** During the week of 10 to 16 June (57 to 63 days after sowing), we  
167 measured daytime photosynthetic rate on a subset of 329 plants evenly spread between

168 treatments and families within populations. The youngest, fully-expanded leaf acclimated  
169 for 3 minutes to reach steady state in a 6-cm<sup>2</sup> chamber of a LI-COR 6400XT Portable Pho-  
170 tosynthesis System (LI-COR Biosciences, Lincoln, Nebraska). We made all measurements  
171 at ambient light (400  $\mu\text{mol m}^{-2} \text{s}^{-1}$  of photosynthetically active radiation), atmospheric  
172 CO<sub>2</sub> (400 ppm), temperature, and moderate relative humidity. During this period, we sus-  
173 pended normal day-to-day temperature fluctuations and set daytime temperatures to the  
174 average for that period (Cool: 26.5°; Hot: 36.1°) so that all plants within a temperature  
175 level could be measured under the same conditions.

176 **Mortality** We assayed mortality during twice-weekly growth measurements. We ana-  
177 lyzed the probability of surviving until the end of the experiment as a function of popula-  
178 tion, treatment, and their interactions using a Generalized Linear Mixed Model (GLMM)  
179 assuming binomially distributed errors. We included Family and Block as random effects.  
180 We assessed significance of fixed effects using Type-II Analysis of Deviance with Wald  $\chi^2$   
181 tests in the R package **car** (Fox and Weisberg, 2011).

## 182 **Intrinsic variation and plasticity**

183 For all traits (Table 2) except germination (see above), we tested for Population, Treat-  
184 ment (Temperature, Water, and Temperature  $\times$  Water), and Population  $\times$  Treatment  
185 interactions (Population  $\times$  Temperature, Population  $\times$  Water, and Population  $\times$  Temper-  
186 ature  $\times$  Water). We interpreted significant Population effects to indicate intrinsic variation  
187 and Population  $\times$  Treatment interactions to indicate variation in plasticity. As mentioned  
188 above, we used survival and GLMM models for germination rate and mortality, respec-  
189 tively. For all other traits, we used mixed model ANOVAs with Family and Block included  
190 as random factors. We fit models using restricted maximum likelihood in **lmer**, a function  
191 in the R package **lme4** (Bates et al., 2015). We determined significant fixed effect terms us-

192 ing a step-wise backward elimination procedure implemented with the step function in the  
193 R package **lmerTest** version 2.0-32 (Kuznetsova et al., 2016). This package uses Satterth-  
194 waite’s approximation to calculate denominator degrees of freedom for  $F$ -tests. We also  
195 included days to germination as a covariate in growth analyses. To ensure that Population  
196 and Treatment effects were specific to a particular growth phase, we included germination  
197 day as a covariate in leaf expansion and stem elongation analyses.

## 198 **Principal components of germination, growth, and photosynthesis**

199 For each single-trait model above, we extracted the Population coefficient (factoring out  
200 Treatment and other effects). The multivariate distribution of these coefficients was then  
201 summarized using principal components analysis. The first principal component of these  
202 traits (TraitPC1) loaded positively with germination, growth, and photosynthetic rate,  
203 therefore we define this as a phenotypic axis delineating fast to slow growth.

## 204 **Identifying putative selective agents**

205 Latitudinal clines are common, but it is often difficult to ascribe this variation to a par-  
206 ticular selective agent. To reiterate, we tested three non-mutually exclusive hypotheses  
207 about how such latitudinal clines emerge: 1) one or two climatic variables explain latitudi-  
208 nal trait variation; 2) latitude is a proxy for multiple climatic factors that together shape  
209 trait variation; and 3) latitude integrates selection in a broader climatic neighborhood. We  
210 found that a population’s position along TraitPC1 correlated strongly with the latitude of  
211 origin (see Results) and next used Random Forest regression (Liaw and Wiener, 2002) to  
212 identify putative climatic factors underlying trait-latitude associations in *E. cardinalis*. We  
213 reasoned that if we identified a single climatic factor that explained more trait variation  
214 than latitude, then this would suggest that factor is a key selective agent underlying the  
215 latitudinal cline (Hypothesis 1). On the other hand, if multiple climatic factors together

216 are necessary to explain trait variation, then this would suggest that many climatic factors  
217 together have imposed selection for the latitudinal cline (Hypothesis 2). We hereafter refer  
218 to factors identified in this analysis as ‘Climate-TraitPC1’ variables. To test Hypothesis  
219 3 about climatic neighborhoods driving selection, we directly compared local with neigh-  
220 borhood climate. We used the immediate collection location for local climate. For climate  
221 neighborhoods, we sampled climate at 1000 random points (at 90-m resolution) within a  
222 62-km radius buffer around the collection and took the average. We chose this buffer radius  
223 based on population genetic structure, as inferred from  $\approx 25,000$  restriction-site associated  
224 SNPs among 49 populations from across the range (Paul et al., In review). Spatial auto-  
225 correlation in allele frequencies persists for 62 km. However radii of 10 km<sup>2</sup> and 100 km<sup>2</sup>  
226 resulted in similar outcomes (data not shown). Since *E. cardinalis* is found exclusively in  
227 riparian areas, we only selected points along streams using the National Hydrogeography  
228 Dataset (United States Geological Survey, 2015). Climatic means and variances (see below)  
229 were weighted by their climatic suitability as determined using a multimodel ensemble av-  
230 erage of ecological niche models (Angert et al., 2016). In addition to comparing local and  
231 neighborhood climate, we compared the univariate correlation between local and neigh-  
232 borhood climate with TraitPC1 and Latitude using paired *t*-tests. We adjusted degrees  
233 of freedom to account for the fact that many climatic factors are highly correlated and  
234 not independent. Specifically, we calculated the effective number of independent climatic  
235 factors ( $M_{\text{eff}}$ ) using the formula  $M_{\text{eff}} = 1 + (M - 1)(1 - \text{Var}(\lambda)/M)$  (Chevrud, 2001), where  
236  $M$  is the original number of climatic factors and  $\lambda$  are the eigenvalues of the correlation  
237 matrix of all climatic factors.

238 To help eliminate potentially spurious correlations between TraitPC1 and climate, we tested  
239 for overlap between climatic variables that best predict latitude of all *E. cardinalis* occur-  
240 rence records (see detail below), not just the 16 focal populations. We refer to these climatic  
241 factors as ‘Climate-Latitude’ variables. The logic is that climatic factors associated with  
242 both TraitPC1 and latitude for all populations are more likely to be important selective

243 agents than climatic factors that happen to correlate with TraitPC1 but do not covary  
244 with latitude throughout the *E. cardinalis* range. Therefore, we did not consider Climate-  
245 TraitPC1 variables to be candidate selective agents unless the same or very similar variable  
246 was found in the Climate-Latitude analysis. However, we do interpret potential selective  
247 agents identified in Climate-Latitude analyses alone, because the goal was to explain the  
248 latitudinal clines in traits, not all aspects of climate that vary with latitude.

249 We selected Climate-Latitude and Climate-TraitPC1 variables independently using Vari-  
250 able Selection Using Random Forest (VSURF) algorithm in the R package **VSURF** version  
251 1.0.3 (Genuer et al., 2016). Random Forest regression is useful for cases like ours when  
252 the number of potential predictors is similar to or greater than the number of observations  
253 ('high  $p$ , low  $n$ ' problem). VSURF is a multistep algorithm that progressively retains or  
254 eliminates variables based on their importance over regression trees in the forest. Variable  
255 importance is defined as the average amount a climate variable reduces mean-squared er-  
256 ror in the predicted response (TraitPC1 or Latitude), compared to a randomly permuted  
257 dataset, across all trees in the random forest (see Genuer et al. [2015] for further detail).  
258 Hence, VSURF automatically eliminates unimportant and redundant variables based on  
259 the data without having to arbitrarily choose among colinear climate variables before the  
260 analysis. We kept only variables selected for prediction, the most stringent criterion. A  
261 visual overview of how we selected climatic variables is depicted in Fig 2.

262 For Climate-Latitude analyses, we compiled a representative set of 356 recent (since 2000)  
263 known *E. cardinalis* occurrences from a comprehensive set of herbarium records and an  
264 exhaustive field survey in 2010-11 (Angert et al., 2016). These occurrences were thinned  
265 by 50% to correct for uneven sampling. For both Climate-TraitPC1 analyses (16 focal  
266 populations) and Climate-Latitude (many populations), we used a 90-m digital elevation  
267 model from HydroSHEDS (Lehner et al., 2006) to extract elevation. Monthly interpolated  
268 climate layers were calculated using ClimateWNA version 5.30 (Wang et al., 2012), which  
269 accurately downscales climate data specifically for the rugged topography of western North

270 America. For each occurrence, we calculated bioclimatic variables using the `biovars` function  
271 in the R package **dismo** version 1.1-1 (Hijmans et al., 2016). We included 24 climatic  
272 factors, 9 from ClimateWNA and 15 bioclimatic variables (Table S2). The bioclimatic  
273 variables included all permutations of two climatic factors, temperature and precipitation,  
274 and six temporal scales (annual average, coldest quarter, warmest quarter, wettest quarter,  
275 driest quarter, or seasonality) as well as mean diurnal range, isothermality, and annual  
276 temperature range. For each variable, we calculated both a 30-year normal by averaging  
277 annual values between 1981 and 2010 and 30-year coefficient of variation, a standardized  
278 metric of interannual climatic variation. Temperatures were converted to Kelvin to be  
279 on a ratio scale appropriate for calculating the coefficient of variation (CV). In total, the  
280 VSURF algorithm selected among 96 climate variables: 24 climatic factors  $\times$  2 types (30-  
281 year average and CV)  $\times$  2 spatial scales (local and neighborhood).

## 282 **Results**

### 283 **A coordinated latitudinal cline in germination, growth, and photosynthe-** 284 **sis**

285 There are strong genetically-based trait differences in time to germination, growth, and  
286 photosynthetic rate among populations of *E. cardinalis*, as evidenced by large and signif-  
287 icant population effects for these traits (Table 3). A single principal component captured  
288 71.6 % of the trait variation among populations, defining an axis of variation from fast to  
289 slow growth. A population's position along this axis strongly covaried with its latitude of  
290 origin; southern populations grew faster than northern populations (Fig 3). There were  
291 similar latitudinal clines for individual traits underlying PC1 (Figures S1 to S4).

**Table 3:** Summary of Population, Treatment, and Population  $\times$  Treatment effects. We used different statistical modeling for the diverse traits assayed – glmer: generalized linear mixed model using the R package **lme4** (Bates et al., 2015); lmer: linear mixed model using the R package **lme4** (Bates et al., 2015); survreg: survival regression using the R package **survival** (Therneau, 2015). Note that temperature and water treatments were imposed after germination, hence are not applicable to this trait. Complete analysis of variance/deviance tables for each trait are available in the Supporting Information. Key to statistical significance: \* $P < 0.05$ ; \*\*  $P < 0.01$ ; \*\*\*  $P < 0.001$

| Trait                            | Germination | Leaf expansion | Stem elongation | Photosynthesis | Mortality |
|----------------------------------|-------------|----------------|-----------------|----------------|-----------|
| Statistical model                | survreg     | lmer           | lmer            | lmer           | glmer     |
| Population                       | ***         | ***            | ***             | ***            |           |
| Temperature                      | NA          | ***            | ***             | **             | ***       |
| Water                            | NA          | *              |                 |                | ***       |
| Pop $\times$ Temp                | NA          |                |                 | *              |           |
| Pop $\times$ Water               | NA          | *              |                 |                |           |
| Temp $\times$ Water              | NA          |                |                 |                | ***       |
| Pop $\times$ Temp $\times$ Water | NA          |                |                 |                |           |

### 292 Little evidence for variation in plasticity

293 Genotype  $\times$  environment (G $\times$ E) interactions are also a common signature of local adap-  
 294 tation. In contrast to the intrinsic differences described above, we found little evidence of  
 295 G $\times$ E in *E. cardinalis*. There were only two statistically significant Population  $\times$  Treat-  
 296 ment interactions (Table 3, Fig. S5), but these were not strong compared to Population  
 297 and Temperature effects. Otherwise, populations responded similarly to treatments: faster  
 298 growth in the hot treatment, slower growth in the dry treatment, and high mortality in  
 299 the hot, dry treatment (Table 3). Complete ANOVA tables are available in the Supporting  
 300 Information (Tables S3 to S6)

### 301 Neighborhood climatic variability best explains latitudinal cline

302 Interannual variation in climate averaged over each populations’s climatic neighborhood  
 303 correlated most strongly with trait variation and latitude of *E. cardinalis* occurrences

304 (Fig. 4, Table S7). All 16 Climate-Latitude and 3 Climate-TraitPC1 variables were neigh-  
305 borhood rather than local variables (Fig. 4). In fact, neighborhood climate almost always  
306 correlated better with TraitPC1 and Latitude than local climate (Fig. 5). On average,  
307 neighborhood Climate-TraitPC1 correlation coefficients were 0.16 higher than correlations  
308 with local-scale climate variables (paired  $t$ -test,  $t = 7.87$ , d.f. = 33.6,  $P = 3.94 \times 10^{-9}$ ).  
309 Likewise, neighborhood Climate-Latitude correlation coefficients were 0.13 higher than  
310 those for local-scale climate (paired  $t$ -test,  $t = 6.71$ , d.f. = 36.8,  $P = 7.22 \times 10^{-8}$ ).

311 Among Climate-Latitude and Climate-TraitPC1 variables, neighborhood climatic variabil-  
312 ity over 30 years (1981–2010) in either winter precipitation (bio16 $_{\sigma}$ ) and/or temperature  
313 (bio11 $_{\sigma}$ ) are the strongest candidates to explain the latitudinal cline in *E. cardinalis* (see  
314 Table S2 for a key to climate variable abbreviations). Note that the coefficient of vari-  
315 ation of a climatic factor is subscripted with  $\sigma$  whereas the mean is subscripted with  $\mu$ .  
316 More specifically, greater winter precipitation variability and lower winter temperature  
317 variability are associated with Southern latitudes and higher TraitPC1 values (Fig. 6A,B).  
318 Neighborhood interannual variation in winter precipitation (bio16 $_{\sigma}$ ) was the most impor-  
319 tant Climate-Latitude variable (Fig. 4A). However, neighborhood bio16 $_{\sigma}$  did not overlap  
320 with Climate-TraitPC1 variables (Fig. 4B). We nevertheless consider it a plausible can-  
321 didate for two reasons. First, neighborhood bio16 $_{\sigma}$  correlated strongly with TraitPC1  
322 (Fig. 6A). Second, one of the most important Climate-TraitPC1 variables (neighborhood  
323 bio15 $_{\sigma}$ ; Fig. 6B,C) is very similar to bio16 $_{\sigma}$ . In Mediterranean climates like California, most  
324 precipitation occurs in the wettest quarter (winter), so years with low winter precipitation  
325 also have low precipitation seasonality. Hence, highly variable year-to-year winter precip-  
326 itation at lower latitude (Fig. 6D) is closely associated with large swings in precipitation  
327 seasonality (Fig. 6C).

328 Interannual variation in temperature of the coldest quarter (neighborhood bio11 $_{\sigma}$ ) is an-  
329 other plausible candidate because it was the only variable in both Climate-Latitude and  
330 Climate-TraitPC1 analyses (Fig. 4). Neighborhood bio11 $_{\sigma}$  explained more variation in



331 TraitPC1 than latitude (latitude  $r^2 = 0.55$  vs. bio11 $_{\sigma}$   $r^2 = 0.6$ ; Fig. S6), whereas neigh-  
332 borhood bio16 $_{\sigma}$  did slightly worse (bio16 $_{\sigma}$   $r^2 = 0.49$ ). Models using bio15 $_{\sigma}$  or bio11 $_{\sigma}$  to  
333 predict TraitPC1 also had significantly lower Akaike Information Criteria (AIC) than the  
334 latitude model (AIC of different models – bio15 $_{\sigma}$ : 48.5; bio11 $_{\sigma}$ : 52.4; latitude: 54.5). The  
335 best two-factor model including both neighborhood bio15 $_{\sigma}$  and bio11 $_{\sigma}$  did not significantly  
336 improve explanatory power ( $r^2 = 0.71$ , AIC= 49.2). In summary, either variation in precip-  
337 itation or temperature seasonality may be important selective agents, but there is no strong  
338 evidence that they are both important. The most important Climate-TraitPC1 variable,  
339 neighborhood variation in mean diurnal range (bio2 $_{\sigma}$ ; Fig. 4B) did not have any obvious  
340 similarity to Climate-Latitude variables. Given the large number of potential associations,  
341 we therefore think this may be a spuriously strong relationship.

## 342 Discussion

343 We found evidence for one of two common signatures of local adaptation in the perennial  
344 herb *Erythranthe cardinalis*. Latitudinal clines in germination rate, photosynthesis, and  
345 growth suggest adaptive differentiation in important physiological traits of the species.  
346 However, we found little evidence that populations respond differently to temperature or  
347 drought. Due to low replication within families, we did not have power to assess within-  
348 population genotype-by-environment interactions, which may be present. As we discuss  
349 below, low variation in plasticity among populations may indicate that some dimensions  
350 of the fundamental abiotic niche are relatively conserved. Note that statistical power to  
351 detect significant plasticity is lower than that for intrinsic differences. However, the fact  
352 that the Population and Temperature effects were often highly significant ( $P \ll 0.001$  in  
353 most cases) suggests that statistical power alone cannot explain low variation in plasticity.  
354 Finally, our results suggest that neighborhood-scale climate and interannual variation are  
355 more important selective agents than local averages. In the paragraphs that follow, we tie

356 these results into the broader threads of evolutionary theory that might help explain why  
357 intrinsic variation in physiology changes clinally, whereas plastic responses to temperature  
358 and drought are relatively static. One caveat to bear in mind is that we are limited by  
359 the size of the climate grid ( $\approx 90 \text{ m}^2$ ) and therefore unable to detect very fine-scale local  
360 adaptation.

361 Evolutionary theory indicates that the shape of fitness tradeoffs, demography, and gene flow  
362 can constrain adaptation (Levins, 1968; Ronce and Kirkpatrick, 2001; Lenormand, 2002)  
363 and hence the type of variation maintained within species. Specifically, adaptive variation  
364 can be maintained by spatially varying selection if tradeoffs are not too strong, demography  
365 is symmetric, and/or maladaptive gene flow is low. Strong tradeoffs can prevent local  
366 adaptation in spatially variable environments because selection favors habitat specialists  
367 that track a specific habitat regardless of its frequency in the environment (Levins, 1968).  
368 For example, a riparian specialist may experience similar selection in rivers of high rainfall  
369 regions and deserts, even though the habitat is much rarer in the latter. In *E. cardinalis* we  
370 found substantial genetically based variation among populations along a phenotypic axis  
371 from fast to slow growth that varied over a large spatial scale (Fig. 3). If this variation  
372 is adaptive, it suggests one of several possibilities to investigate in the future: the fitness  
373 tradeoff between low versus high latitude environments is not too strong nor swamped  
374 by demographic asymmetry or maladaptive gene flow. That is, alleles favoured at one  
375 latitude are not strongly selected against when they flow to another population, allowing  
376 locally adaptive genetic variation to be maintained by spatially heterogenous selection. We  
377 also know from previous work that population size does not vary strongly with latitude  
378 (Angert, unpub. data). Gene flow appears to be high, but attenuates at broad spatial  
379 scales, especially between Southern ( $< 35^\circ\text{N}$ ) and Northern portions of the range (Paul  
380 et al., In review).

381 Nevertheless, local gene flow from similar environments may shape how selection varies  
382 with latitude. Theory predicts that populations will not be perfectly adapted to their

383 immediate habitat when there is gene flow from surrounding populations with different  
384 optima (Lenormand, 2002). With spatial heterogeneity and gene flow, traits will not covary  
385 perfectly with the local optimum (Slatkin, 1978; Paul et al., 2011; Hadfield, 2016), but  
386 should instead better match the average environment experienced by nearby populations  
387 connected through gene flow, which we refer to as the climatic neighborhood. Gene flow  
388 and spatial heterogeneity may therefore be important in maintaining genetic variation  
389 (Yeaman and Jarvis, 2006). As this hypothesis predicts, climatic neighborhoods (62-km  
390 buffer around populations) correlated with traits and latitude of occurrences better than  
391 local climate (Fig. 4). We interpret this as suggestive evidence that gene flow between  
392 neighboring *E. cardinalis* populations shapes selection – populations are locally adapted to  
393 prevailing climate in their neighborhood, but perhaps not perfectly adapted to their local  
394 climate. This may not greatly constrain local adaptation because local and neighborhood  
395 climate values were generally similar in *E. cardinalis* populations (Fig. 5), at least at the  
396 resolution of ClimateWNA (90 m<sup>2</sup>). Therefore, we would predict in reciprocal transplants  
397 that populations whose local climate is farther from their neighborhood average would be  
398 less well adapted than those close to their neighborhood average.

399 It is reasonable to predict that southern populations, which appear to experience more  
400 frequent drought years (see below), might have physiological adaptation to survive and  
401 grow in drier soil. We found no evidence for this type of drought tolerance; all popula-  
402 tions responded to drought and temperature similarly (Table 3). Plants grew faster in  
403 the Hot treatment, but there was little effect of drought on growth. Rather, the effects  
404 of drought took longer to materialize but resulted in high mortality, especially in the Hot  
405 treatment. However, there was no differential mortality among populations in this treat-  
406 ment. Although our results indicate that this axis of the species niche may be constrained,  
407 plants have multiple ways to resist drought through both tolerance and escape (Ludlow,  
408 1989; Kooyers, 2015). Next, we consider why drought tolerance may be less important in local  
409 adaptation than a form of escape for this species.

410 We hypothesize that tolerance to dry soil may be constrained by a combination of strong  
411 fitness tradeoffs, demographic asymmetry, and gene flow. Soil moisture in riparian habitats  
412 where *E. cardinalis* lives is highly heterogeneous at very small spatial scales (several me-  
413 ters). Plants in the stream never have to tolerate drought whereas plants only a few meters  
414 away may experience extreme drought since there is little direct precipitation during the  
415 growing season in Mediterranean climates of western North America. We hypothesize alle-  
416 les that confer greater drought tolerance may be quite costly in well-watered soils, and *vice*  
417 *versa*, leading to strong fitness tradeoffs. Such tradeoffs would promote specialization to  
418 one soil moisture or another, thereby inhibiting the evolution of broad environmental tol-  
419 erance within a population. Demography and gene flow may reinforce niche conservatism.  
420 A new mutant with increased drought tolerance that could survive at the resource-poor  
421 margin of a population would likely be demographically overwhelmed by the larger census  
422 populations that can be maintained in higher-resource environments. Infrequent wet years  
423 may also produce most seeds, so selection is weighted towards alleles that have high fitness  
424 in the wet environment, even if dry years are more frequent (Templeton and Levin, 1979;  
425 Brown and Venable, 1986). Finally, gene flow, which is generally high among *E. cardinalis*  
426 populations within the same ecoregion (Paul et al., In review), will thwart local adapta-  
427 tion and reinforce specialization. Thus, the spatial grain of the environment, demographic  
428 asymmetry, and gene flow may conspire to constrain local adaptation along this environ-  
429 mental axis. Consistent with this hypothesis, recent record-setting droughts have caused  
430 the decline or even local extinction of some natural populations of *E. cardinalis* (Sheth and  
431 Angert, 2017).

432 In sum, these results indicate that intrinsic differences in physiology and growth, but not  
433 plastic responses to temperature and drought, mediate local adaptation to climate in *E.*  
434 *cardinalis*. Next, we would like to understand why variation in these particular traits  
435 may be adaptive. We argue that temporally more variable environments, as experienced  
436 by southern populations, select for a more ‘annualized’ life-history strategy, a form of

437 drought escape. Demographic observations in natural populations of *E. cardinalis* reveal  
438 that southern populations tend to flower earlier at a smaller size, while northern popula-  
439 tions invest more in vegetative growth (Sheth and Angert, 2017). The association between  
440 position along the ‘fast-slow’ continuum and associated traits in *E. cardinalis* is similar to  
441 interspecific relationships between growth, functional traits, and life history (Adler et al.,  
442 2014; Salguero-Gómez et al., 2016). However, we cannot exclude unexplored factors (e.g.  
443 edaphic conditions, competitors, pollinators, etc.) which may also contribute to the lati-  
444 tudinal cline.

445 Greater investment in aboveground growth, as opposed to belowground storage for future  
446 seasons, may be favoured in climates with more frequent drought years, but maladaptive  
447 in climates with more consistent precipitation. This is a form of drought escape in that  
448 plants are investing more reproduction in the present to avoid possible drought in subse-  
449 quent years. Suppose plants that grow quickly and allocate new resources to continued  
450 growth rather than storage have higher fitness over a single growing season. However,  
451 by not allocating resources to storage, these fast-growing plants begin future seasons at a  
452 deficit. Therefore, in a stable environment where winter survivorship is assured in most  
453 years, failure to store resources may reduce lifetime fitness. But for perennial herbs in  
454 Mediterranean climates, a dry winter (rainy season) can kill the rhizomes (underground  
455 stems that store nutrients for future growth) before emergence or aboveground stems before  
456 flowering. If drought years occur frequently enough, selection may favour the fast-growing  
457 strategy because there is no advantage to storage if drought kills plants before flower-  
458 ing. Considering life-history strategy as a continuum from no storage (annual) to lots of  
459 storage (perennial), we hypothesize that the optimal allocation to aboveground growth is  
460 more ‘annualized’ in southern climates that have greater interannual variation in precipi-  
461 tation. This scenario differs from classic drought escape syndromes in which plants speed  
462 up development early in the season before the onset of drought.

463 The hypothesis that greater precipitation variability selects for an annualized life history

464 is tentative, but consistent with theory and data from other species. Life history theory  
465 shows that less variable environments are one factor that favours the evolution of perenni-  
466 ality (Stearns, 1976; Iwasa and Cohen, 1989; Friedman and Rubin, 2015). Populations of  
467 the perennial *Plantago asiatica* show a similar latitudinal cline in growth and allocation to  
468 storage (Sawada et al., 1994), though these authors attribute the cline to variation in grow-  
469 ing season length. There are also life history clines in the closely related species *E. guttata*,  
470 but the underlying traits and climatic drivers are quite different. Annual *E. guttata* flower  
471 sooner and produce fewer stolons in response to climates with shorter seasons and more  
472 intense summer drought (Lowry and Willis, 2010; Friedman et al., 2015; Kooyers et al.,  
473 2015). In contrast, there are no truly annual (monocarpic and semelparous) populations of  
474 *E. cardinalis*. Rather, our hypothesis states that climatic variability selects on quantitative  
475 variation in allocation to growth versus storage. This hypothesis makes several indepen-  
476 dent, testable predictions. The allocation tradeoff predicts that northern populations will  
477 provision more photosynthetic assimilate to rhizomes compared with southern populations.  
478 If southern populations are indeed more ‘annualized’ because more frequent droughts cause  
479 mortality, then we predict that species distribution models using recent climate would best  
480 predict occurrences in the south, whereas longer term climate would be a better predictor  
481 in the north. Finally, we predict that southern populations would show greater variation  
482 in the size of recruits and higher maximum population growth rates.

483 In summary, we found evidence for a coordinated latitudinal cline in germination rate,  
484 photosynthesis, and growth, suggesting local adaptation. We therefore predict to find  
485 different optima for these traits in different climates. We did not find evidence that the  
486 relative performance of populations shifts with temperature or watering regime, suggesting  
487 relatively little variation in plasticity. Exploratory analysis implicate that more variable  
488 precipitation regimes at lower latitude drive much of the latitudinal cline, though other  
489 climatic factors could also contribute. Interestingly, the climatic neighborhood may shape  
490 selective pressures more than local climate. In the future, we will use field experiments to

491 test whether greater variation in precipitation selects for faster growth and if selection on  
492 temperature/drought responses does not vary among populations. By doing so, we aim  
493 to understand why certain physiological and developmental mechanisms, but not others,  
494 contribute to local adaptation.

## 495 **References**

- 496 Adler, P. B., R. Salguero-Gómez, A. Compagnoni, J. S. Hsu, J. Ray-Mukherjee, C. Mbeau-  
497 Ache, and M. Franco, 2014. Functional traits explain variation in plant life history  
498 strategies. *Proceedings of the National Academy of Sciences of the United States of*  
499 *America* 111:740–745.
- 500 Aitken, S. N. and M. C. Whitlock, 2013. Assisted gene flow to facilitate local adaptation  
501 to climate change. *Annual Review of Ecology, Evolution, and Systematics* 44:367–388.
- 502 Angert, A. L., 2006. Demography of central and marginal populations of monkeyflowers  
503 (*Mimulus cardinalis* and *M. lewisii*). *Ecology* 87:2014–2025.
- 504 Angert, A. L., M. J. Bayly, S. N. Sheth, and J. R. Paul, 2016. Testing range-limit hypothe-  
505 ses using range-wide habitat suitability and occupancy for the scarlet monkeyflower  
506 (*Mimulus cardinalis*) .
- 507 Angert, A. L., H. Bradshaw Jr, and D. W. Schemske, 2008. Using experimental evolution  
508 to investigate geographic range limits in monkeyflowers. *Evolution* 62:2660–2675.
- 509 Barton, N. H., 1999. Clines in polygenic traits. *Genetics Research* 74:223–236.
- 510 Bates, D., M. Mächler, B. Bolker, and S. Walker, 2015. Fitting linear mixed-effects  
511 models using lme4. *Journal of Statistical Software* 67:1–48. URL [http://CRAN.R-](http://CRAN.R-project.org/package=lme4)  
512 [project.org/package=lme4](http://CRAN.R-project.org/package=lme4). R package version 1.1-7.

- 513 Blackman, B. K., S. D. Michaels, and L. H. Rieseberg, 2011. Connecting the sun to  
514 flowering in sunflower adaptation. *Molecular Ecology* 20:3503–3512.
- 515 Bradshaw, H. and D. W. Schemske, 2003. Allele substitution at a flower colour locus  
516 produces a pollinator shift in monkeyflowers. *Nature* 426:176–178.
- 517 Bradshaw, W. and C. Holzapfel, 2008. Genetic response to rapid climate change: it's  
518 seasonal timing that matters. *Molecular ecology* 17:157–166.
- 519 Bradshaw, W. E. and C. M. Holzapfel, 2001. Genetic shift in photoperiodic response corre-  
520 lated with global warming. *Proceedings of the National Academy of Sciences* 98:14509–  
521 14511.
- 522 Brown, J. S. and D. L. Venable, 1986. Evolutionary ecology of seed-bank annuals in  
523 temporally varying environments. *The American Naturalist* 127:31–47.
- 524 Chevrud, J., 2001. A simple correction for multiple comparisons in interval mapping genome  
525 scans. *Heredity* 87:52–58.
- 526 Clausen, J., D. Keck, and W. Hiesey, 1940. Experimental studies on the nature of species.  
527 I. The effects of varied environments on western American plants, vol. 520. Carnegie  
528 Institution of Washington, Washington, D.C.
- 529 Cleveland, W. S., E. Grosse, and W. M. Shyu, 1992. Local regression models. *Statistical*  
530 *models in S* Pp. 309–376.
- 531 Coyne, J. A. and E. Beecham, 1987. Heritability of two morphological characters within  
532 and among natural populations of *Drosophila melanogaster*. *Genetics* 117:727–737. URL  
533 <http://www.genetics.org/content/117/4/727>.
- 534 Endler, J., 1977. Geographic variation, clines, and speciation. Princeton University Press,  
535 Princeton, NJ.
- 536 Fox, J. and S. Weisberg, 2011. *An R Companion to Applied Regression*. Second ed. Sage,



- 537 Thousand Oaks CA.
- 538 Friedman, J. and M. J. Rubin, 2015. All in good time: Understanding annual and perennial  
539 strategies in plants. *American Journal of Botany* 102:497–499.
- 540 Friedman, J., A. D. Twyford, J. H. Willis, and B. K. Blackman, 2015. The extent and  
541 genetic basis of phenotypic divergence in life history traits in *Mimulus guttatus*. *Molecular*  
542 *Ecology* 24:111–122.
- 543 Genuer, R., J.-M. Poggi, and C. Tuleau-Malot, 2015. VSURF: An R package for variable  
544 selection using random forests. *The R Journal* 7:19–33.
- 545 ———, 2016. VSURF: Variable Selection Using Random Forests. URL [http://CRAN.R-](http://CRAN.R-project.org/package=VSURF)  
546 [project.org/package=VSURF](http://CRAN.R-project.org/package=VSURF). R package version 1.0.3.
- 547 Gilbert, P., 2014. Brief User’s Guide: Dynamic Systems Estimation. URL [http://cran.r-](http://cran.r-project.org/web/packages/dse/vignettes/dse-guide.pdf)  
548 [project.org/web/packages/dse/vignettes/dse-guide.pdf](http://cran.r-project.org/web/packages/dse/vignettes/dse-guide.pdf).
- 549 Givnish, T. J., 1988. Adaptation to sun and shade: a whole-plant perspective. *Functional*  
550 *Plant Biology* 15:63–92.
- 551 Hadfield, J. D., 2010. Mcmc methods for multi-response generalized linear mixed mod-  
552 els: The MCMCglmm R package. *Journal of Statistical Software* 33:1–22. URL  
553 <http://www.jstatsoft.org/v33/i02/>.
- 554 ———, 2016. The spatial scale of local adaptation in a stochastic environment. *Ecology*  
555 *Letters* 19:780–788.
- 556 Hereford, J., 2009. A quantitative survey of local adaptation and fitness trade-offs. *The*  
557 *American Naturalist* 173:579–588.
- 558 Hereford, J. and A. A. Winn, 2008. Limits to local adaptation in six populations of the  
559 annual plant *Diodia teres*. *New Phytologist* 178:888–896.
- 560 Hiesey, W., M. Nobs, and O. Björkman, 1971. Experimental studies on the nature of

- 561 species. V. Biosystematics, genetics, and physiological ecology of the Erythranthe section  
562 of *Mimulus*, vol. 628. Carnegie Institution of Washington, Washington, D.C.
- 563 Hiesey, W. M., J. Clausen, and D. D. Keck, 1942. Relations between climate and intraspe-  
564 cific variation in plants. *American Naturalist* Pp. 5–22.
- 565 Hijmans, R. J., S. Phillips, J. Leathwick, and J. Elith, 2016. dismo: Species distribution  
566 modeling. URL <http://CRAN.R-project.org/package=dismo>. R package version 1.1-1.
- 567 Hoffmann, A. A., A. Anderson, and R. Hallas, 2002. Opposing clines for high and low  
568 temperature resistance in *Drosophila melanogaster*. *Ecology Letters* 5:614–618.
- 569 Hopkins, R., J. Schmitt, and J. R. Stinchcombe, 2008. A latitudinal cline and response to  
570 vernalization in leaf angle and morphology in *Arabidopsis thaliana* (Brassicaceae). *New*  
571 *Phytologist* 179:155–164.
- 572 Huey, R. B., G. W. Gilchrist, M. L. Carlson, D. Berrigan, and L. Serra, 2000. Rapid  
573 evolution of a geographic cline in size in an introduced fly. *Science* 287:308–309.
- 574 Huxley, J. S., 1938. Clines: an auxiliary taxonomic principle. *Nature* 142:219–220.
- 575 Iwasa, Y. and D. Cohen, 1989. Optimal growth schedule of a perennial plant. *American*  
576 *Naturalist* 133:480–505.
- 577 Kawecki, T. J. and D. Ebert, 2004. Conceptual issues in local adaptation. *Ecology Letters*  
578 7:1225–1241.
- 579 Kooyers, N. J., 2015. The evolution of drought escape and avoidance in natural herbaceous  
580 populations. *Plant Science* 234:155–162.
- 581 Kooyers, N. J., A. B. Greenlee, J. M. Colicchio, M. Oh, and B. K. Blackman, 2015. Repli-  
582 cate altitudinal clines reveal that evolutionary flexibility underlies adaptation to drought  
583 stress in annual *Mimulus guttatus*. *New Phytologist* 206:152–165.
- 584 Kooyers, N. J. and K. M. Olsen, 2012. Rapid evolution of an adaptive cyanogenesis cline

- 585 in introduced north american white clover (*Trifolium repens* L.). *Molecular Ecology*  
586 21:2455–2468.
- 587 Kuznetsova, A., P. Bruun Brockhoff, and R. Haubo Bojesen Christensen, 2016.  
588 lmerTest: Tests in Linear Mixed Effects Models. URL [http://CRAN.R-](http://CRAN.R-project.org/package=lmerTest)  
589 [project.org/package=lmerTest](http://CRAN.R-project.org/package=lmerTest). R package version 2.0-32.
- 590 Lehner, B., K. Verdin, and A. Jarvis, 2006. HydroSHEDS technical documentation. World  
591 Wildlife Fund, Washington, D.C. URL [www.worldwildlife.org/hydrosheds](http://www.worldwildlife.org/hydrosheds).
- 592 Leimu, R. and M. Fischer, 2008. A meta-analysis of local adaptation in plants. *PLoS One*  
593 3:e4010–e4010.
- 594 Lenormand, T., 2002. Gene flow and the limits to natural selection. *Trends in Ecology &*  
595 *Evolution* 17:183–189.
- 596 Levins, R., 1968. *Evolution in changing environments: some theoretical explorations*.  
597 Princeton University Press, Princeton, New Jersey.
- 598 Liaw, A. and M. Wiener, 2002. Classification and regression by randomforest. *R News*  
599 2:18–22. URL <http://CRAN.R-project.org/doc/Rnews/>.
- 600 Lowry, D. B. and J. H. Willis, 2010. A widespread chromosomal inversion polymorphism  
601 contributes to a major life-history transition, local adaptation, and reproductive isola-  
602 tion. *PLoS biology* 8:2227.
- 603 Ludlow, M. M., 1989. Strategies of response to water stress. Pp. 269–281, *in* K. H. Kreeb,  
604 H. Richter, and T. M. Hinckley, eds. *Structural and functional responses to environmental*  
605 *stresses*. SPB Academic, The Hague, The Netherlands.
- 606 Nesom, G. L., 2014. Taxonomy of *Erythranthe* sect. *Erythranthe* (phrymaceae). *Phytoneu-*  
607 *ron* 31:1–41.
- 608 Oakeshott, J., J. Gibson, P. Anderson, W. Knibb, D. Anderson, and G. Chambers, 1982.

- 609 Alcohol dehydrogenase and glycerol-3-phosphate dehydrogenase clines in *Drosophila*  
610 *melanogaster* on different continents. *Evolution* Pp. 86–96.
- 611 Paul, J. R., T. L. Parchman, B. Econopouly, C. A. Buerkle, and A. L. Angert, In review.  
612 Population genomics and range limits: diversity and differentiation across the geographic  
613 range of *Mimulus cardinalis* (Phrymaceae) .
- 614 Paul, J. R., S. N. Sheth, and A. L. Angert, 2011. Quantifying the impact of gene flow  
615 on phenotype-environment mismatch: A demonstration with the scarlet monkeyflower  
616 *Mimulus cardinalis*. *The American Naturalist* 178:S62–S79.
- 617 Pfaff, B., 2008. VAR, SVAR and SVEC models: Implementation within R package vars.  
618 *Journal of Statistical Software* 27:1–32.
- 619 Ronce, O. and M. Kirkpatrick, 2001. When sources become sinks: migrational meltdown  
620 in heterogeneous habitats. *Evolution* 55:1520–1531.
- 621 Salguero-Gómez, R., O. R. Jones, E. Jongejans, S. P. Blomberg, D. J. Hodgson, C. Mbeau-  
622 Ache, P. A. Zuidema, H. de Kroon, and Y. M. Buckley, 2016. Fast–slow continuum and  
623 reproductive strategies structure plant life-history variation worldwide. *Proceedings of*  
624 *the National Academy of Sciences of the United States of America* 113:230–235.
- 625 Sawada, S., Y. Nakajima, M. Tsukuda, K. Sasaki, Y. Hazama, M. Futatsuya, and  
626 A. Watanabe, 1994. Ecotypic differentiation of dry matter production processes in re-  
627 lation to survivorship and reproductive potential in *Plantago asiatica* populations along  
628 climatic gradients. *Functional Ecology* 8:400–409.
- 629 Schemske, D. W., G. G. Mittelbach, H. V. Cornell, J. M. Sobel, and K. Roy, 2009. Is  
630 there a latitudinal gradient in the importance of biotic interactions? *Annual Review of*  
631 *Ecology, Evolution, and Systematics* 40:245–269.
- 632 Schluter, D., 2000. *The Ecology of Adaptive Radiation*. Oxford University Press.
- 633 Schmidt, P. S., L. Matzkin, M. Ippolito, and W. F. Eanes, 2005. Geographic variation in di-

- 634 apause incidence, life-history traits, and climatic adaptation in *Drosophila melanogaster*.  
635 *Evolution* 59:1721–1732.
- 636 Sheth, S. N. and A. L. Angert, 2017. Demographic compensation does not rescue *Mimulus*  
637 *cardinalis* populations at the southern edge of the species range. *bioRxiv* .
- 638 Slatkin, M., 1978. Spatial patterns in the distributions of polygenic characters. *Journal of*  
639 *Theoretical Biology* 70:213–28.
- 640 Stearns, S., 1976. Life history tactics: a review of the ideas. *Quarterly Review of Biology*  
641 51.
- 642 Stinchcombe, J. R., C. Weinig, M. Ungerer, K. M. Olsen, C. Mays, S. S. Halldorsdottir,  
643 M. D. Purugganan, and J. Schmitt, 2004. A latitudinal cline in flowering time in *Ara-*  
644 *bidopsis thaliana* modulated by the flowering time gene FRIGIDA. *Proceedings of the*  
645 *National Academy of Sciences of the United States of America* 101:4712–4717.
- 646 Stock, A. J., B. E. Campitelli, and J. R. Stinchcombe, 2014. Quantitative genetic variance  
647 and multivariate clines in the ivyleaf morning glory, *Ipomoea hederacea*. *Philosophical*  
648 *Transactions of the Royal Society B: Biological Sciences* 369:20130259.
- 649 Templeton, A. R. and D. A. Levin, 1979. Evolutionary consequences of seed pools. *The*  
650 *American Naturalist* 114:232–249.
- 651 Therneau, T. M., 2015. survival: A Package for Survival Analysis in S. URL  
652 <http://CRAN.R-project.org/package=survival>. R package version 2.38.
- 653 Turesson, G., 1922. The genotypic response of the plant species to habitat. *Hereditas*  
654 3:211–350.
- 655 Umina, P., A. Weeks, M. Kearney, S. McKechnie, and A. Hoffmann, 2005. A rapid shift  
656 in a classic clinal pattern in drosophila reflecting climate change. *Science* 308:691–693.
- 657 United States Geological Survey, 2015. National Hydrogeography Dataset. United States

- 658 Geological Survey, Washington, D.C. URL <http://nhd.usgs.gov/index.html>.
- 659 Wang, T., A. Hamann, D. L. Spittlehouse, and T. Q. Murdock, 2012. ClimateWNA –  
660 high-resolution spatial climate data for western North America. *Journal of Applied*  
661 *Meteorology and Climatology* 51:16–29.
- 662 Wright, K. M., D. Lloyd, D. B. Lowry, M. R. Macnair, and J. H. Willis, 2013. Indirect  
663 evolution of hybrid lethality due to linkage with selected locus in *Mimulus guttatus*. *PLoS*  
664 *Biol* 11:e1001497.
- 665 Wu, C., D. Lowry, A. Cooley, K. Wright, Y. Lee, and J. Willis, 2008. *Mimulus* is an  
666 emerging model system for the integration of ecological and genomic studies. *Heredity*  
667 100:220–230.
- 668 Wu, C. A., D. B. Lowry, L. I. Nutter, and J. H. Willis, 2010. Natural variation for drought-  
669 response traits in the *Mimulus guttatus* species complex. *Oecologia* 162:23–33.
- 670 Yeaman, S. and A. Jarvis, 2006. Regional heterogeneity and gene flow maintain variance  
671 in a quantitative trait within populations of lodgepole pine. *Proceedings of the Royal*  
672 *Society of London B* 273:1587–1593.

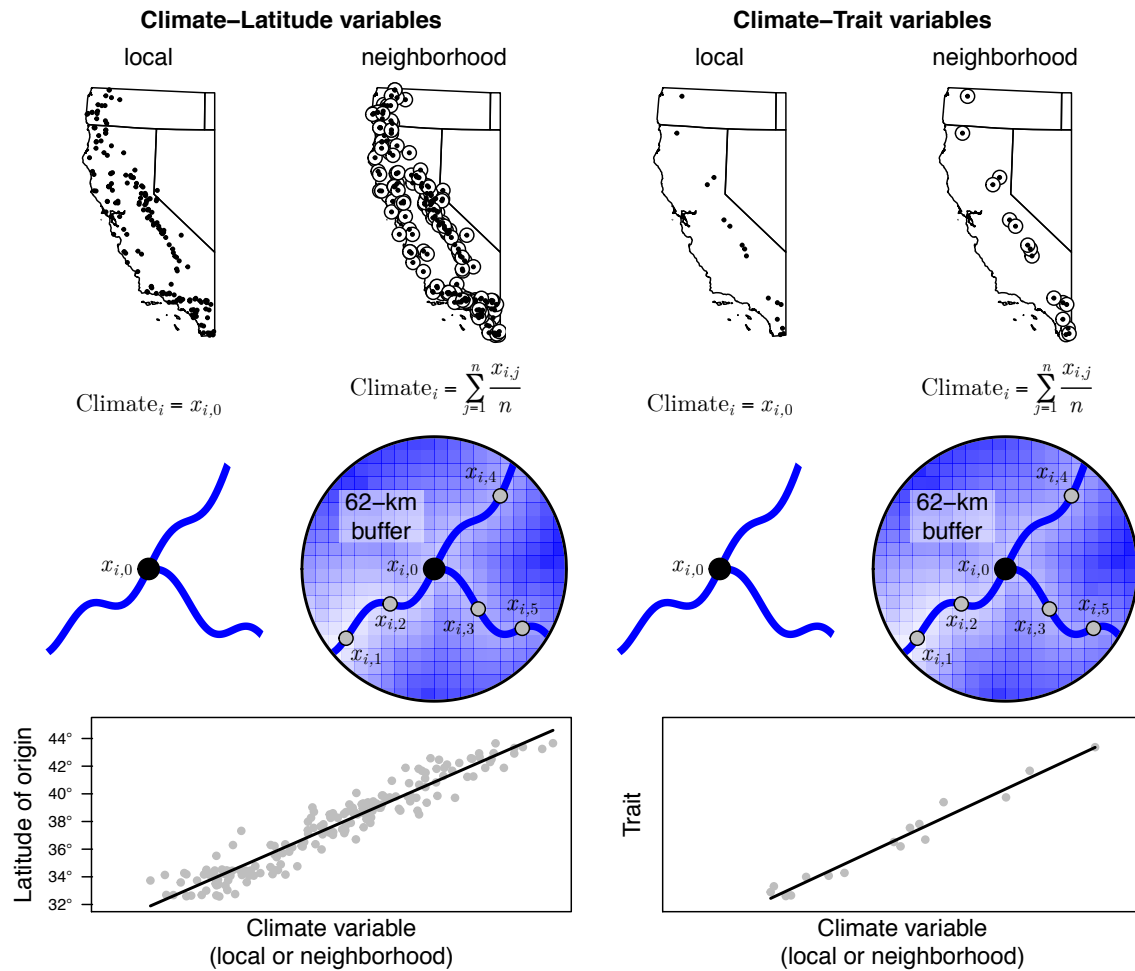

**Figure 2:** Overview of method for identifying putative climatic selective agents underlying latitudinal cline. We looked for climate variables that explained both the latitude of 356 *E. cardinalis* occurrences ('Climate-Latitude variables') and with traits ('Climate-Trait variables'). For Climate-Latitude variables we extracted climate data from recent occurrences located throughout California and Oregon, USA (shown in map). For Climate-Trait variables, we extracted climatic data for the 16 focal populations. For both analyses, we extracted local and neighborhood climate. Local climate refers to climate only from where a population was collected ( $x_{i,0}$ ). Neighborhood climate was calculated as the average over 1000 points in a 62-km radius climatic neighborhood ( $x_{i,1}, x_{i,2}, \dots$ ), but only along stream habitats as *E. cardinalis* is riparian. We identified climatic factors that most strongly predicted latitude of occurrences (Climate-Latitude variables) and traits (Climate-Trait variables), as shown for hypothetical data in plots at the bottom of the figure.

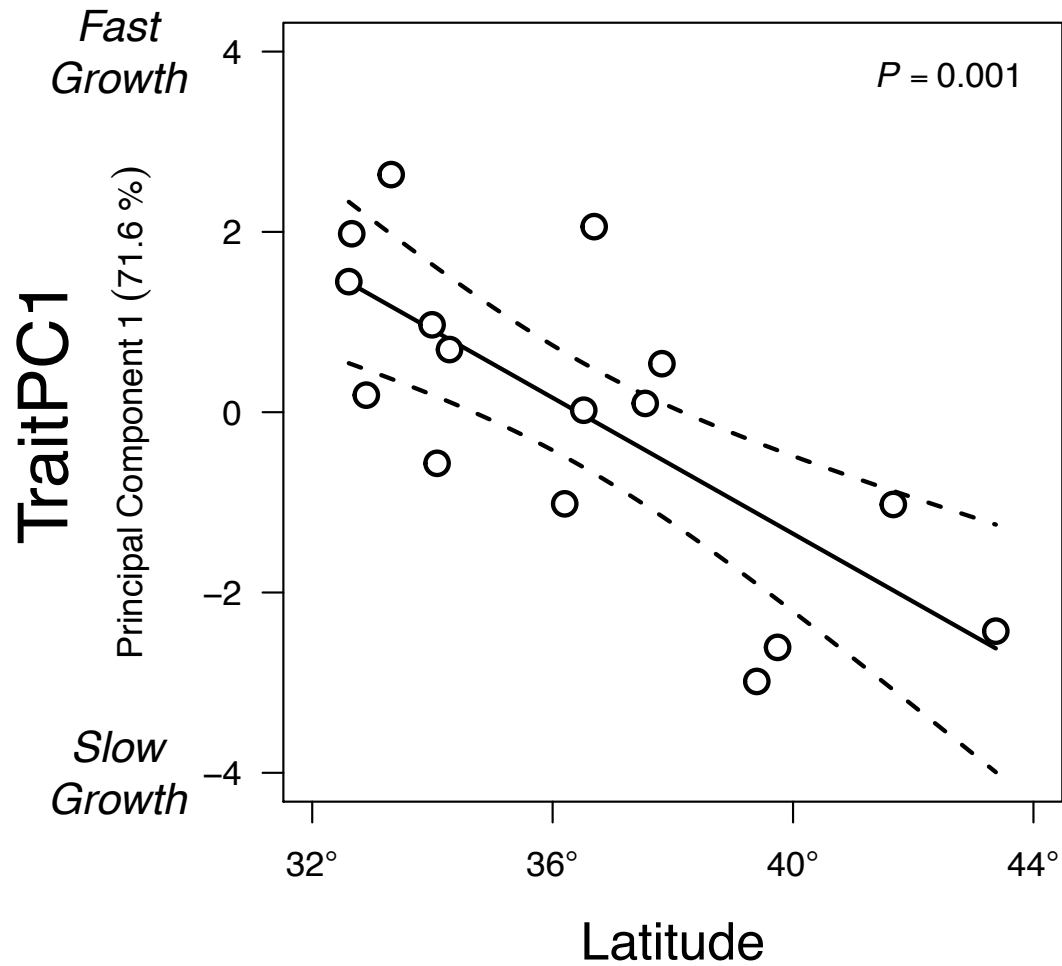

**Figure 3:** Trait variation, from fast to slow growth, is closely associated with latitude. Each point is a population's latitude of origin (x-axis) and position along the slow to fast growth axis (y-axis), defined as Principal Component 1 of four traits (see Material and Methods). The line and 95% confidence intervals were estimated using linear regression.



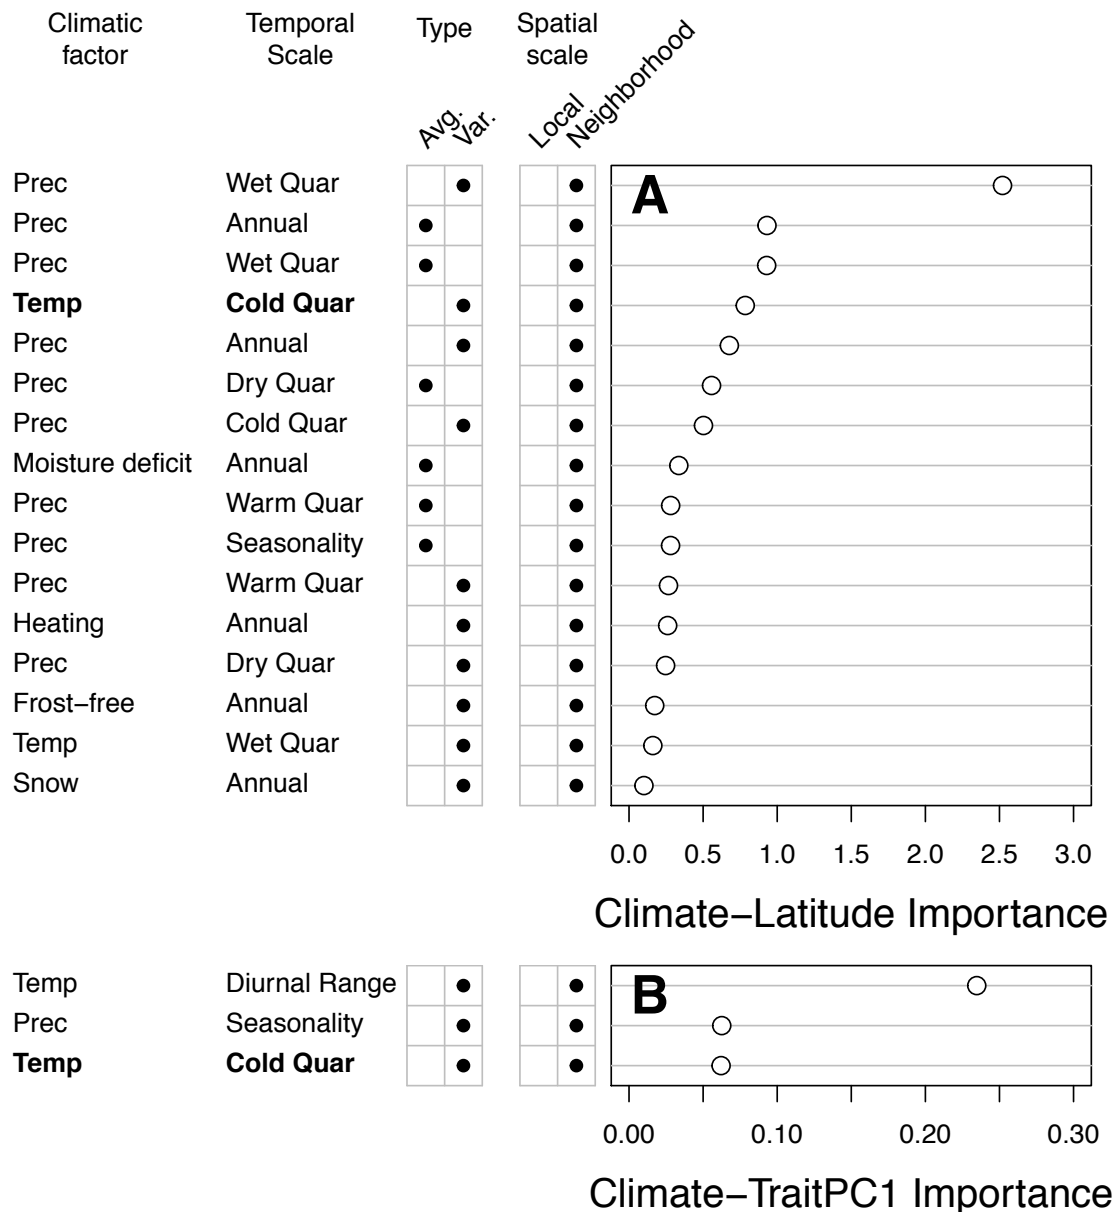

**Figure 4:** Climatic variation integrated over climatic neighborhood is closely correlated with latitude of *E. cardinalis* and trait variation. A. Using Random Forest regression, we identified 16 climatic variables significantly (high importance) associated with latitude of *E. cardinalis* occurrences. B. Only one of the most important Climate-Latitude variables (in bold) was among the most important Climate-TraitPC1 variables. Variable importance is defined as the average amount a climate variable reduces mean-squared error in the predicted response (TraitPC1 or Latitude), compared to a randomly permuted dataset, across all trees in the random forest (see Genuer et al. [2015] for further detail). Note that the Importance values in A and B are not comparable because the dependent variables (Latitude and Trait PC1, respectively) are on different scales. Climatic variables (left of A; right of B) are defined by four qualities: Climatic factor – Temperature (Temp), Precipitation (Prec), Heating degree-days (Heating), Snow (precipitation as snow); Temporal scale – Annual, Coldest quarter (Cold Quar), Warmest Quarter (Warm Quar), Wettest quarter (Wet Quar), Driest Quarter (Dry Quar), or Seasonality; Type – 30-year average (Avg.) or coefficient of variation (Var.); Spatial scale – local or 62-km radius climatic neighborhood.

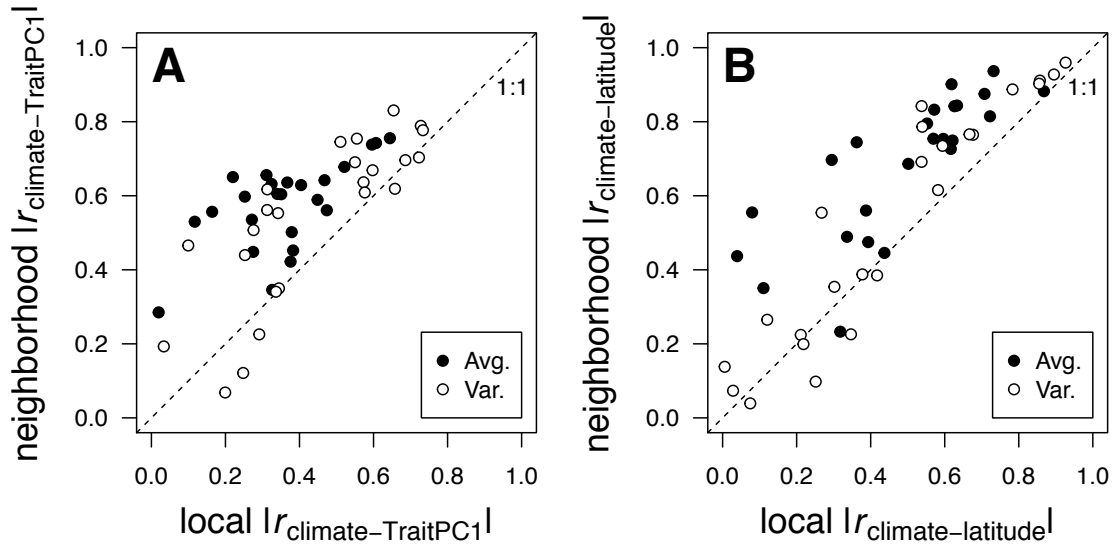

**Figure 5:** Neighborhood climate predicts TraitPC1 ('Climate-trait', panel A) and Latitude of occurrences ('Climate-latitude', panel B) better than local climate. Each point is the absolute value of the Pearson correlation coefficient ( $|r|$ ) between TraitPC1 (A) or latitude (B) for 24 climatic factors, for which we used both the 30-year mean (closed circles) and coefficient of variation (open circles). Most points lie above the 1:1 line, indicating stronger correlations with neighborhood compared to local climate. Neighborhood climate was integrated over a 62-km radius around focal populations (see text for further detail).

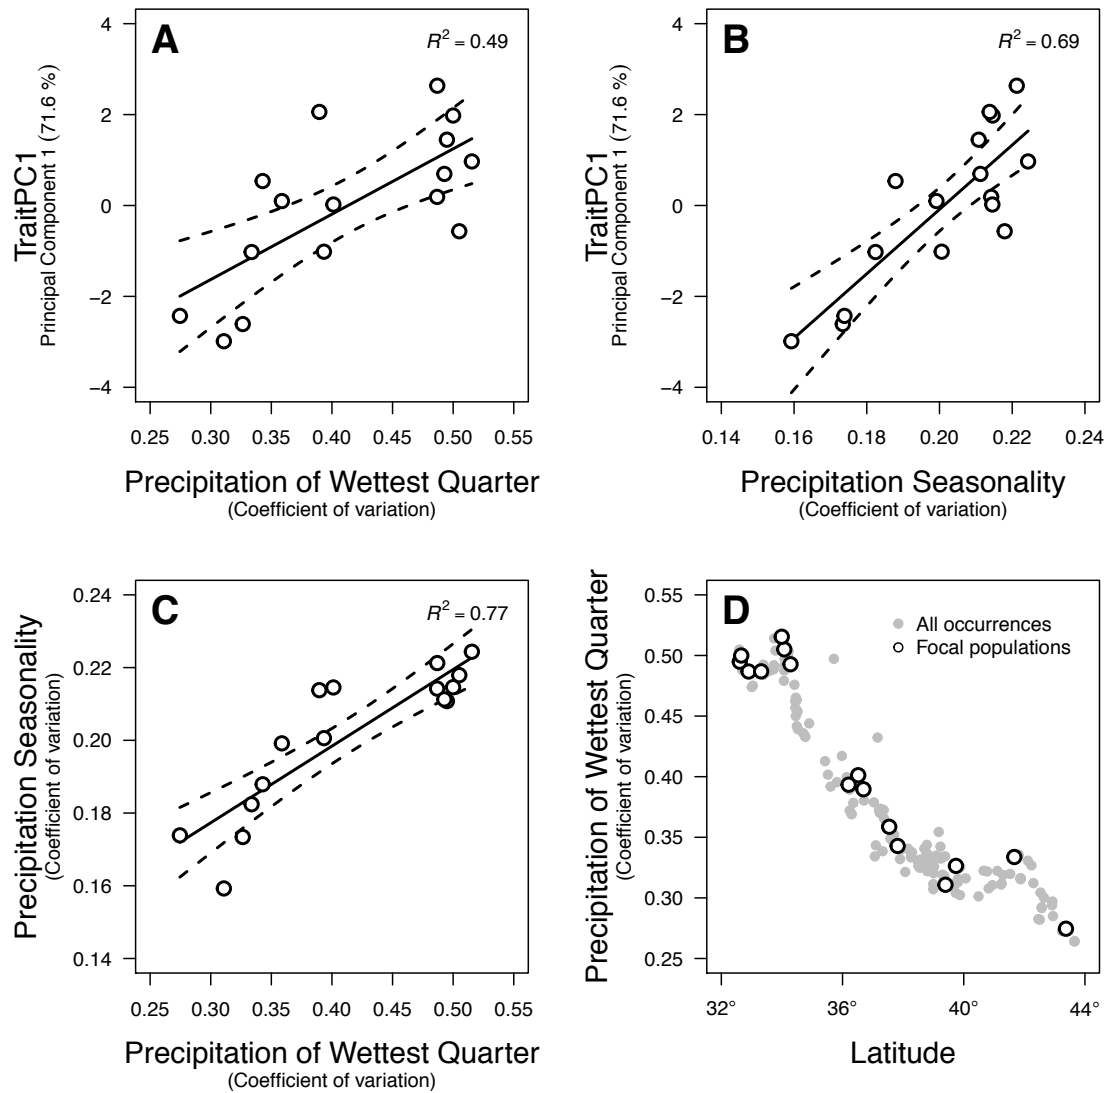

**Figure 6:** Variation in precipitation is correlated with TraitPC1 and latitude. A. Greater values of TraitPC1 are associated with greater interannual variation in precipitation of the wettest quarter. This was the most important Climate-Latitude variable, but not among the most important Climate-TraitPC1 variables. B. However, a closely related parameter, interannual variation in precipitation seasonality, was among the most important Climate-TraitPC1 variables. C. Across focal populations, variation in precipitation of the wettest quarter and seasonality are closely correlated. D. Southern populations of *E. cardinalis* experience much greater interannual variation in precipitation. In all panels, we report climatic neighborhood values (see Material and Methods). Regression lines, 95% confidence intervals, and coefficients of determination ( $R^2$ ) were calculated using linear regression.

673 **Supporting Information**

674 **Supporting Tables**

**Table S1:** Initial size of seedlings did not vary among Populations, Families, or Treatments. We used a censored Gaussian model of initial size at the outset of the experiment (longest leaf length of the first true leaves). The model was censored because we could not accurately measure leaves less than 0.25 mm with digital callipers (217 of 702, 30.9%, were too small). We fit models using a Bayesian MCMC method implemented using the MCMCglmm function with default priors in the R package **MCMCglmm** version 2.17 (Hadfield, 2010). We estimated the posterior distribution from 1000 samples of an MCMC chain run for  $10^5$  steps after a  $10^4$  step burn-in. We used step-wise backward elimination procedure to find the best-supported model according to Deviance Information Criterion (DIC).

| Model                                                                                                                                       | Random | DIC    |
|---------------------------------------------------------------------------------------------------------------------------------------------|--------|--------|
| Population + Water + Temperature +<br>Population:Water +<br>Population:Temperature +<br>Water:Temperature +<br>Population:Water:Temperature | Family | 1638   |
| Population + Water + Temperature +<br>Population:Water +<br>Population:Temperature +<br>Water:Temperature                                   | Family | 1605.2 |
| Population + Water + Temperature +<br>Population:Water +<br>Population:Temperature                                                          | Family | 1603.4 |
| Population + Water + Temperature +<br>Population:Water +<br>Water:Temperature                                                               | Family | 1577.5 |
| Population + Water + Temperature +<br>Population:Temperature +<br>Water:Temperature                                                         | Family | 1579.9 |
| Population + Water + Temperature +<br>Population:Water                                                                                      | Family | 1577.3 |
| Population + Water + Temperature +<br>Water:Temperature                                                                                     | Family | 1550.5 |
| Population + Water + Temperature                                                                                                            | Family | 1549.3 |
| Population + Water                                                                                                                          | Family | 1541.7 |
| Population + Temperature                                                                                                                    | Family | 1546.8 |
| Water + Temperature                                                                                                                         | Family | 1551.1 |
| Population                                                                                                                                  | Family | 1541.9 |
| Water                                                                                                                                       | Family | 1543.9 |
| -                                                                                                                                           | Family | 1541.7 |
| -                                                                                                                                           | -      | 1538.3 |

**Table S2:** Climatic variables used

| Abbreviation | Climate variable                                                               |
|--------------|--------------------------------------------------------------------------------|
| DD_0         | degree-days below 0°C(chilling degree-days)                                    |
| DD5          | degree-days above 5°C(growing degree-days)                                     |
| DD_18        | degree-days below 18°C(heating degree-days)                                    |
| DD18         | degree-days above 18°C(cooling degree-days)                                    |
| NFFD         | number of frost-free days                                                      |
| PAS          | precipitation as snow (mm) between August in previous year and July in current |
| Eref         | Hargreaves reference evaporation (mm)                                          |
| CMD          | Hargreaves climatic moisture deficit (mm)                                      |
| RH           | mean annual relative humidity                                                  |
| bio1         | annual mean temperature                                                        |
| bio2         | mean diurnal range (mean of monthly (max temp - min temp))                     |
| bio3         | isothermality (bio2/bio7) (* 100)                                              |
| bio4         | temperature seasonality (standard deviation *100)                              |
| bio5         | max temperature of warmest month                                               |
| bio6         | min temperature of coldest month                                               |
| bio7         | temperature annual range (bio5-bio6)                                           |
| bio8         | mean temperature of wettest quarter                                            |
| bio9         | mean temperature of driest quarter                                             |
| bio10        | mean temperature of warmest quarter                                            |
| bio11        | mean temperature of coldest quarter                                            |
| bio12        | annual precipitation                                                           |
| bio15        | precipitation seasonality (coefficient of variation)                           |
| bio16        | precipitation of wettest quarter                                               |
| bio17        | precipitation of driest quarter                                                |
| bio18        | precipitation of warmest quarter                                               |
| bio19        | precipitation of coldest quarter                                               |

**Table S3:** Analysis of variance (ANOVA) table on leaf expansion rate (LER) using **lmerTest** (Kuznetsova et al., 2016). Family and Block were included as random effects. Abbreviations: SS = sum of squares; MS = mean sum of squares (SS / df1); df1 = numerator degrees of freedom; df2 = denominator degrees of freedom.

|                                  | SS    | MS    | df1 | df2 | <i>F-value</i> | <i>P-value</i>       |
|----------------------------------|-------|-------|-----|-----|----------------|----------------------|
| Day to Germination               | 12.12 | 12.12 | 1   | 637 | 35.21          | $4.9 \times 10^{-9}$ |
| Population                       | 22.22 | 1.48  | 15  | 118 | 4.3            | $2.5 \times 10^{-6}$ |
| Temperature                      | 80.42 | 80.42 | 1   | 5   | 233.61         | $2.6 \times 10^{-5}$ |
| Water                            | 4.1   | 4.1   | 1   | 5   | 11.92          | 0.019                |
| Temperature × Water              | 0.03  | 0.03  | 1   | 4   | 0.07           | 0.801                |
| Population × Temperature         | 2.76  | 0.18  | 15  | 547 | 0.53           | 0.925                |
| Population × Water               | 9.66  | 0.64  | 15  | 562 | 1.87           | 0.024                |
| Population × Temperature × Water | 4.11  | 0.27  | 15  | 530 | 0.78           | 0.700                |

**Table S4:** Analysis of variance (ANOVA) table on stem elongation rate (SER) using **lmerTest** (Kuznetsova et al., 2016). Family and Block were included as random effects. Abbreviations: SS = sum of squares; MS = mean sum of squares (SS / df1); df1 = numerator degrees of freedom; df2 = denominator degrees of freedom.

|                                  | SS   | MS   | df1 | df2 | <i>F-value</i> | <i>P-value</i>       |
|----------------------------------|------|------|-----|-----|----------------|----------------------|
| Day to Germination               | 3.6  | 3.6  | 1   | 662 | 21.1           | $5.1 \times 10^{-6}$ |
| Population                       | 12   | 0.8  | 15  | 113 | 4.7            | $5.8 \times 10^{-7}$ |
| Temperature                      | 12.4 | 12.4 | 1   | 6   | 72.8           | $1.5 \times 10^{-4}$ |
| Water                            | 0.6  | 0.6  | 1   | 5   | 3.7            | 0.113                |
| Temperature × Water              | 0.9  | 0.9  | 1   | 4   | 5.2            | 0.093                |
| Population × Temperature         | 3.6  | 0.2  | 15  | 549 | 1.4            | 0.126                |
| Population × Water               | 2.8  | 0.2  | 15  | 536 | 1.1            | 0.330                |
| Population × Temperature × Water | 1.5  | 0.1  | 15  | 518 | 0.6            | 0.874                |

**Table S5:** Analysis of variance (ANOVA) table on photosynthetic rate using **lmerTest** (Kuznetsova et al., 2016). Family and Block were included as random effects. Abbreviations: SS = sum of squares; MS = mean sum of squares (SS / df1); df1 = numerator degrees of freedom; df2 = denominator degrees of freedom.

|                                  | SS    | MS    | df1 | df2 | <i>F</i> -value | <i>P</i> -value      |
|----------------------------------|-------|-------|-----|-----|-----------------|----------------------|
| Population                       | 347.7 | 23.2  | 15  | 78  | 3.02            | $7.5 \times 10^{-4}$ |
| Temperature                      | 134.1 | 134.1 | 1   | 6   | 17.46           | $6.4 \times 10^{-3}$ |
| Water                            | 51    | 51    | 1   | 4   | 6.64            | 0.066                |
| Temperature × Water              | 0.7   | 0.7   | 1   | 3   | 0.09            | 0.781                |
| Population × Temperature         | 218.6 | 14.6  | 15  | 263 | 1.9             | 0.024                |
| Population × Water               | 87.7  | 5.8   | 15  | 233 | 0.76            | 0.724                |
| Population × Temperature × Water | 91.4  | 6.1   | 15  | 208 | 0.79            | 0.686                |

**Table S6:** Analysis of deviance table on the probability of mortality by the end of the experiment using Type-II Wald  $\chi^2$  tests in the R package **car** (Fox and Weisberg, 2011). Family and Block were included as random effects. Abbreviations: df = degrees of freedom

|                                  | $\chi^2$ | df | <i>P</i> -value       |
|----------------------------------|----------|----|-----------------------|
| Population                       | 32       | 31 | 0.419                 |
| Temperature                      | 31.8     | 6  | $1.8 \times 10^{-5}$  |
| Water                            | 69.2     | 12 | $4.6 \times 10^{-10}$ |
| Temperature × Water              | 20.7     | 1  | $5.3 \times 10^{-6}$  |
| Population × Temperature         | 5.6      | 15 | 0.985                 |
| Population × Water               | 8.6      | 15 | 0.897                 |
| Population × Temperature × Water | 0.2      | 15 | 1.000                 |



**Table S7:** Important climatic variables predicting latitude of *E. cardinalis* populations ('Climate-Latitude') and the first principal component of traits measured in a common garden ('Climate-TraitPC1'). Local climatic variables were measured from the exact location of collection; neighborhood climatic variables were averaged from a 62-km neighborhood around population (see Material and Methods). Importance and significance were determined using the variable selection using random forests (VSURF) algorithm (see Material and Methods). Climatic variables are described in Table S2.  $\mu$  signifies the mean of the climate variables from 1981–2010;  $\sigma$  indicates coefficient of variation among years.

| Climate-Latitude variables                                     | Climate-TraitPC1 variables                                     |
|----------------------------------------------------------------|----------------------------------------------------------------|
| Precipitation of wettest quarter ( $\sigma$ , neighborhood)    | Mean diurnal range ( $\sigma$ , neighborhood)                  |
| Annual precipitation ( $\mu$ , neighborhood)                   | Precipitation seasonality ( $\sigma$ , neighborhood)           |
| Precipitation of wettest quarter ( $\mu$ , neighborhood)       | Mean temperature of coldest quarter ( $\sigma$ , neighborhood) |
| Mean temperature of coldest quarter ( $\sigma$ , neighborhood) |                                                                |
| Annual precipitation ( $\sigma$ , neighborhood)                |                                                                |
| Precipitation of driest quarter ( $\mu$ , neighborhood)        |                                                                |
| Precipitation of coldest quarter ( $\sigma$ , neighborhood)    |                                                                |
| Hargreaves climatic moisture deficit ( $\mu$ , neighborhood)   |                                                                |
| Precipitation of warmest quarter ( $\mu$ , neighborhood)       |                                                                |
| Precipitation seasonality ( $\mu$ , neighborhood)              |                                                                |
| Precipitation of warmest quarter ( $\sigma$ , neighborhood)    |                                                                |
| Heating degree-days ( $\sigma$ , neighborhood)                 |                                                                |
| Precipitation of driest quarter ( $\sigma$ , neighborhood)     |                                                                |
| Number of frost-free days ( $\sigma$ , neighborhood)           |                                                                |
| Mean temperature of wettest quarter ( $\sigma$ , neighborhood) |                                                                |
| Precipitation as snow ( $\sigma$ , neighborhood)               |                                                                |

675 Supporting Figures

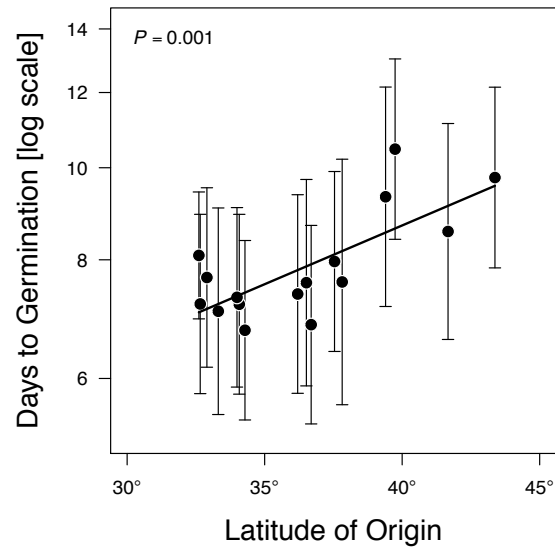

**Figure S1:** Southern populations germinate faster. Each point is a population of *E. cardinalis* showing its latitude of origin (x-axis) and model-predicted days to germination in days under growth chamber conditions (see Material and Methods). Bars around each point are 95% confidence intervals. Predicted time to germination and confidence intervals are based on survival regression (see Materials and Materials). The line is the linear regression of  $\log(\text{model-predicted days to germination}) \sim \text{latitude}$ . The  $P$ -value of the regression is given in the upper left corner.

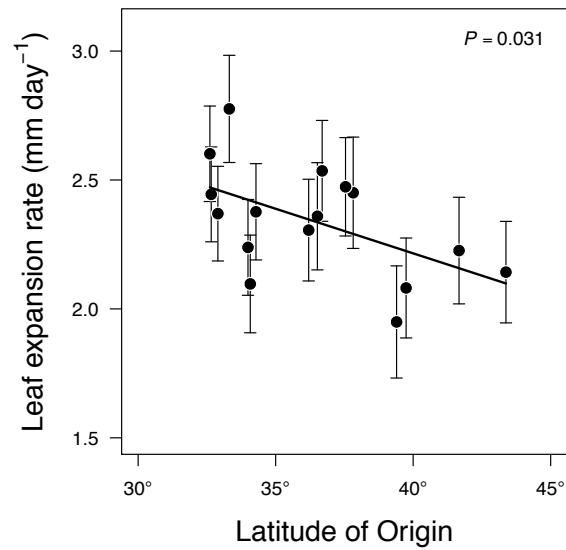

**Figure S2:** Southern populations grow faster. Each point is a population of *E. cardinalis* showing its latitude of origin (x-axis) and model-predicted leaf expansion rate during the rosette phase. Bars around each point are 95% confidence intervals. Predicted leaf expansion rate based least-square mean estimates and confidence intervals were calculated from linear mixed-effects models (see Materials and Materials). The line is the linear regression of model-predicted leaf expansion rate  $\sim$  latitude. The  $P$ -value of the regression is given in the upper right corner.

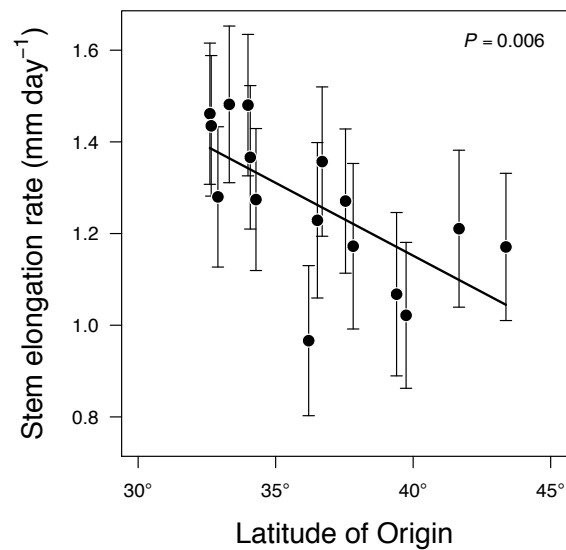

**Figure S3:** Southern populations grow faster. Each point is a population of *E. cardinalis* showing its latitude of origin (x-axis) and model-predicted stem elongation rate. Bars around each point are 95% confidence intervals. Predicted stem elongation rate based least-square mean estimates and confidence intervals were calculated from linear mixed-effects models (see Materials and Materials). The line is the linear regression of model-predicted stem elongation rate  $\sim$  latitude. The  $P$ -value of the regression is given in the upper right corner.

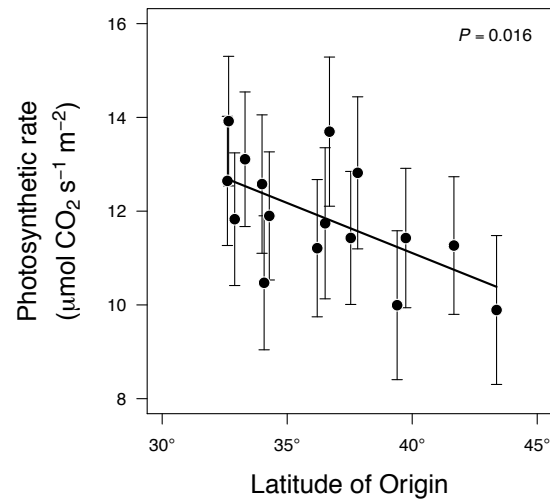

**Figure S4:** Southern populations photosynthesize faster. Each point is a population of *E. cardinalis* showing its latitude of origin (x-axis) and model-predicted instantaneous photosynthetic rate. Bars around each point are 95% confidence intervals. Predicted photosynthetic rates based least-square mean estimates and confidence intervals were calculated from linear mixed-effects models (see Materials and Materials). The line is the linear regression of model-predicted photosynthetic rate  $\sim$  latitude. The *P*-value of the regression is given in the upper right corner.

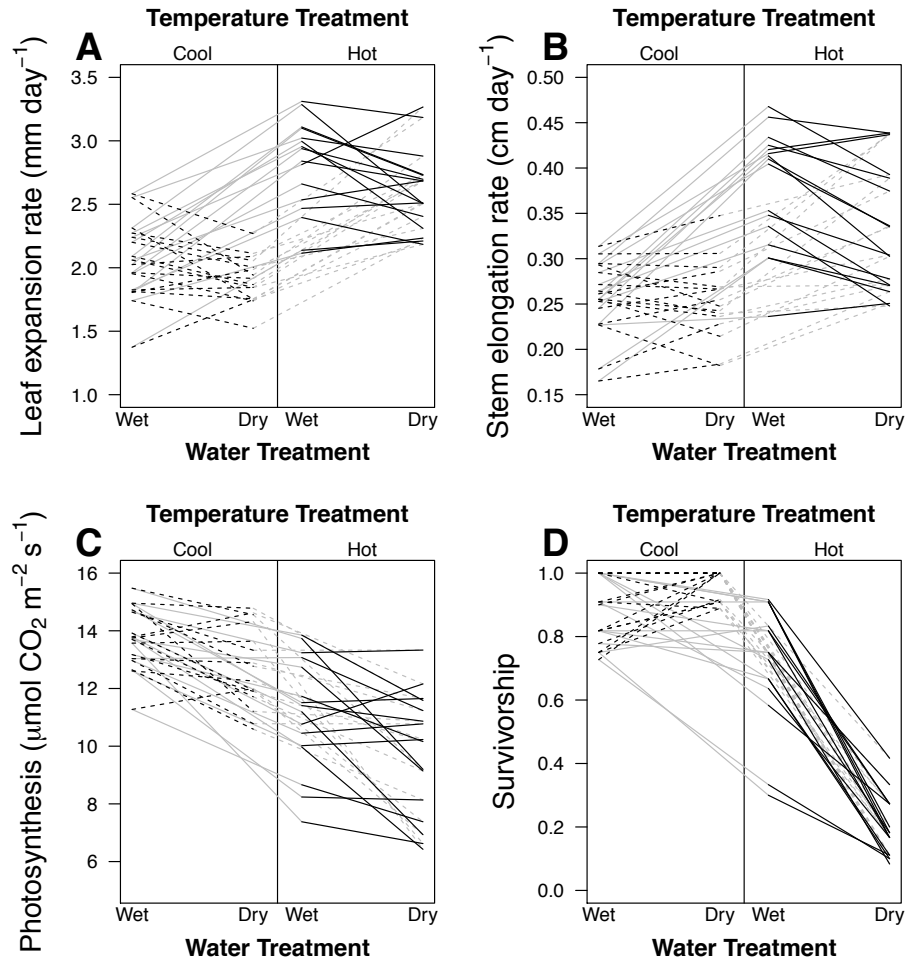

**Figure S5:** Reaction norms signify little Population × Treatment interactions. For all panels, black lines represent population-level reaction norms from Wet to Dry in the Cool temperature treatment (dashed black lines) and Hot temperature treatment (solid black lines); gray lines represent reaction norms from Cool to Hot in the Wet treatment (solid gray lines) and Dry treatment (dashed gray lines). The responses shown are (A) leaf expansion rate, (B) stem elongation rate, (C) photosynthesis, and (D) survivorship (= 1 - mortality).

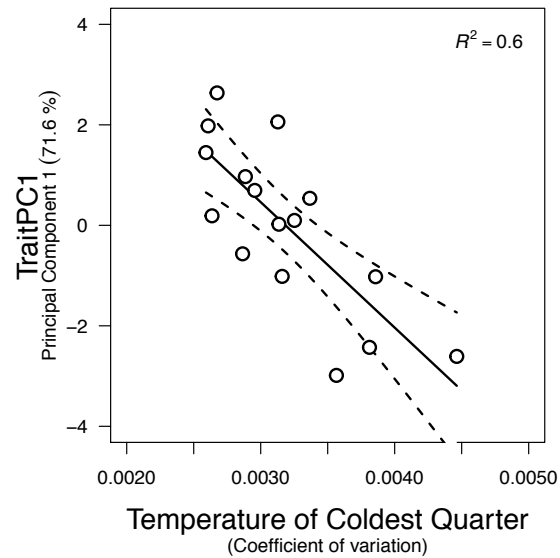

**Figure S6:** Trait variation, from fast to slow growth, is closely associated with neighborhood variation in temperature of the coldest quarter ( $\text{bio11}_\sigma$ ). Each point is a population coefficient of variation in  $\text{bio11}$  averaged over a 62-km climatic neighborhood (x-axis) and position along the slow to fast growth axis (y-axis), defined as Principal Component 1 of four traits (see Material and Methods). The line and 95% confidence intervals were estimated using linear regression.

## 676 **Supporting Material and Methods**

### 677 **Temperature treatments**

678 We simulated typical growing season (June 1 - August 15) air temperatures at the two most  
679 thermally divergent focal sites in our study, Whitewater Canyon (WWC, Hot) and Little  
680 Jameson (LIJ, Cool). We downloaded daily interpolated mean, minimum, and maximum  
681 air temperature from 13 years (2000-2012) at both sites from ClimateWNA (Wang et al.,  
682 2012). This range was chosen because seeds used in the experiment were collected around  
683 2012, thus their presence in that location at that time suggests that populations were able  
684 to persist there for at least some years before collection. Monthly temperatures from Cli-  
685 mateWNA are highly correlated with the air temperature recorded from data loggers in  
686 the field at these sites (A. Angert, unpub. data). Hence, the ClimateWNA temperature  
687 profiles are similar to actual thermal regimes experienced by *E. cardinalis* in nature. We  
688 simulated realistic temperature regimes by calculating the mean temperature trend from  
689 June to August using LOESS (Cleveland et al., 1992). The residuals were highly autocor-  
690 related at both sites (warmer than average days are typically followed by more warm days)  
691 and there was strong correlation ( $r = 0.65$ ) between sites (warm days in WWC were also  
692 warm in LIJ). The ‘VARselect’ function in the **vars** package for R (Pfaff, 2008) indicated  
693 that a lag two Vector Autoregression (VAR(2)) model best captured the within-site auto-  
694 correlation as well as between-site correlation in residuals. We fit and simulated from the  
695 VAR(2) model using the package **dse** (Gilbert, 2014) in R. Simulated data closely resem-  
696 bled the autocorrelation and between-site correlation of the actual data. From simulated  
697 mean temperature, we next selected minimum and maximum daily temperatures. Mean,  
698 min, and max temperature were highly correlated at both sites. We chose min and max  
699 temperatures using site-specific fitted linear models between mean, max, and min tem-  
700 perature, with additional variation given by normally distributed random deviates with  
701 variance equal to the residual variance of the linear models. For each day, the nighttime



702 (22:00 - 6:00) chamber temperature was set to the simulated minimum temperature. Dur-  
703 ing the middle of the day, temperature was set to the simulated maximum temperature,  
704 with a variable period of transition between min and max so that the average temperature  
705 was equal the simulated mean temperature.

## 706 **Watering treatments**

707 For watering treatments, we simulated two extreme types of streams where *E. cardinalis*  
708 grows. In the well-watered treatment, we simulated a large stream that never goes dry  
709 during the summer growing season. In the drought treatment, we simulated a small stream  
710 that has ample flow at the beginning of the season due to rain and snow melt, but gradually  
711 dries down through the summer. In both treatments, plants were bottom-watered using  
712 water chilled to 7.5°C. Plants in the well-watered treatment were fully saturated every two  
713 hours during the day. Watering in the drought treatment gradually declined from every  
714 two hours to every day between May 20 (36 days after sowing) and 10 June (57 days after  
715 sowing). Simultaneously, the amount of bottom-watering per flood decreased, such that  
716 only the bottom of the cone-tainers were wetted by the end of the experiment.
